# Supplementary material for: Synthetic approach to 2-alkyl-4-quinolones and 2-alkyl-4-quinolone-3-carboxamides based on common β-keto amide precursors
Source: publisher site journal article supplement (doi:10.3762/bjoc.19.132), 2023-11-23

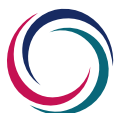

## Supporting Information

for

### **Synthetic approach to 2-alkyl-4-quinolones and 2-alkyl-4-quinolone-3-carboxamides based on common $\beta$ -keto amide precursors**

Yordanka Mollova-Sapundzhieva, Plamen Angelov, Danail Georgiev and Pavel Yanev

*Beilstein J. Org. Chem.* **2023**, *19*, 1804–1810. [doi:10.3762/bjoc.19.132](https://doi.org/10.3762/bjoc.19.132)

## Processed NMR spectra

|                                                             |      |
|-------------------------------------------------------------|------|
| <b>Table of contents</b> .....                              | Page |
| Processed NMR spectra ( <sup>1</sup> H/ <sup>13</sup> C)    |      |
| 1-Hydroxy-2-alkyl-4-quinolone-3-carboxamides <b>4</b> ..... | S2   |
| 2-Alkyl-4-quinolone-3-carboxamides <b>5</b> .....           | S7   |
| 2-Alkyl-4-quinolones <b>8</b> .....                         | S16  |

Primary NMR data available at: <https://doi.org/10.5281/zenodo.8337063>

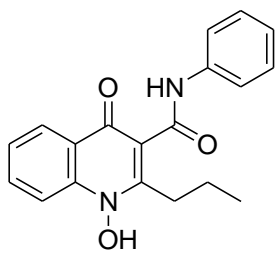

4a

400 MHz, DMSO-*d*<sub>6</sub>

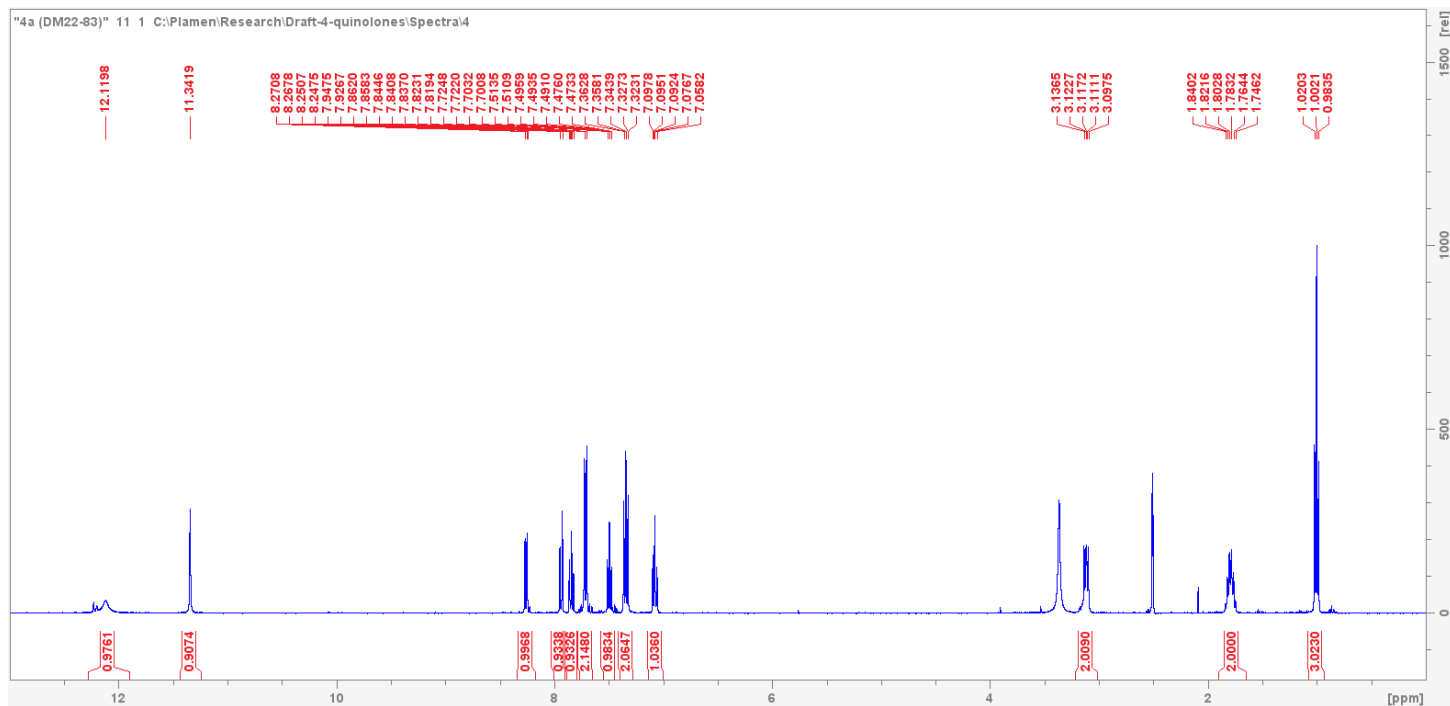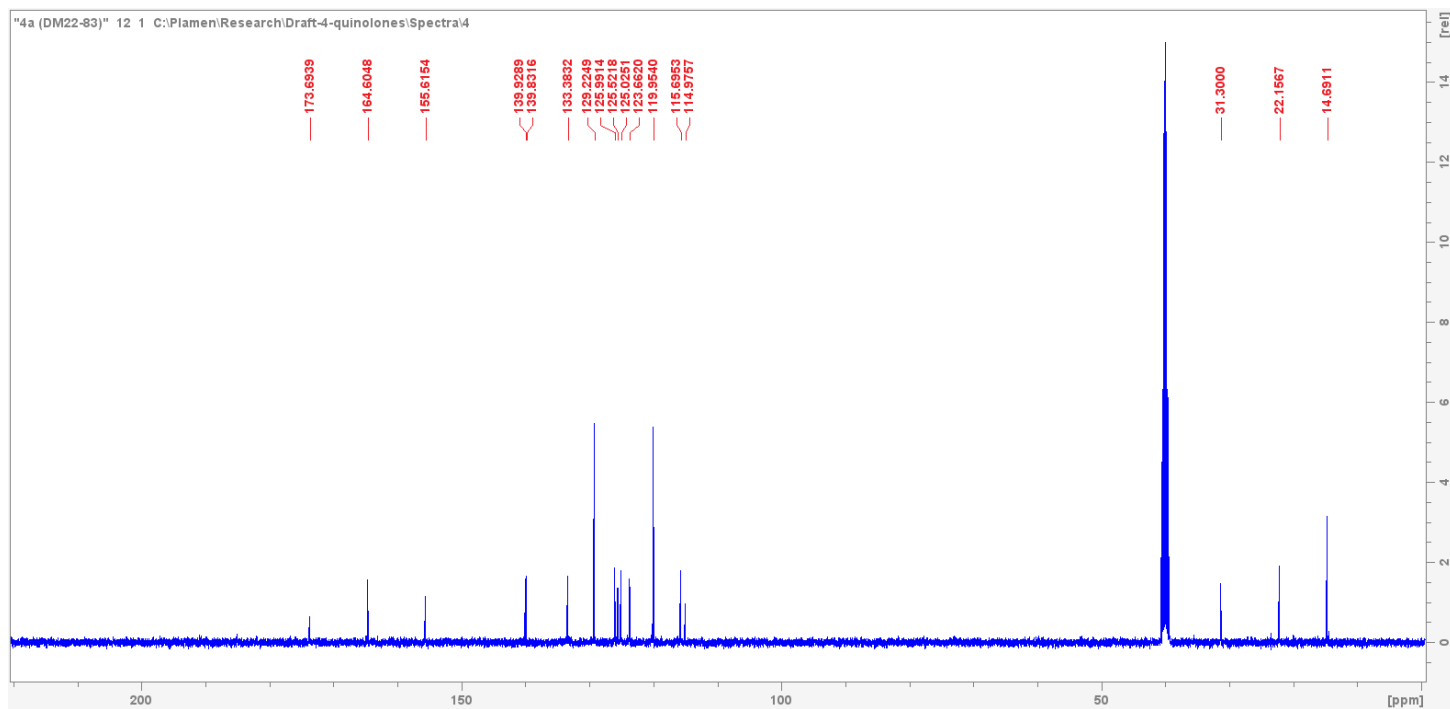

4b

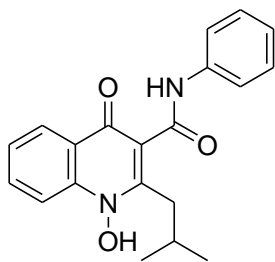

400 MHz, DMSO-*d*<sub>6</sub>

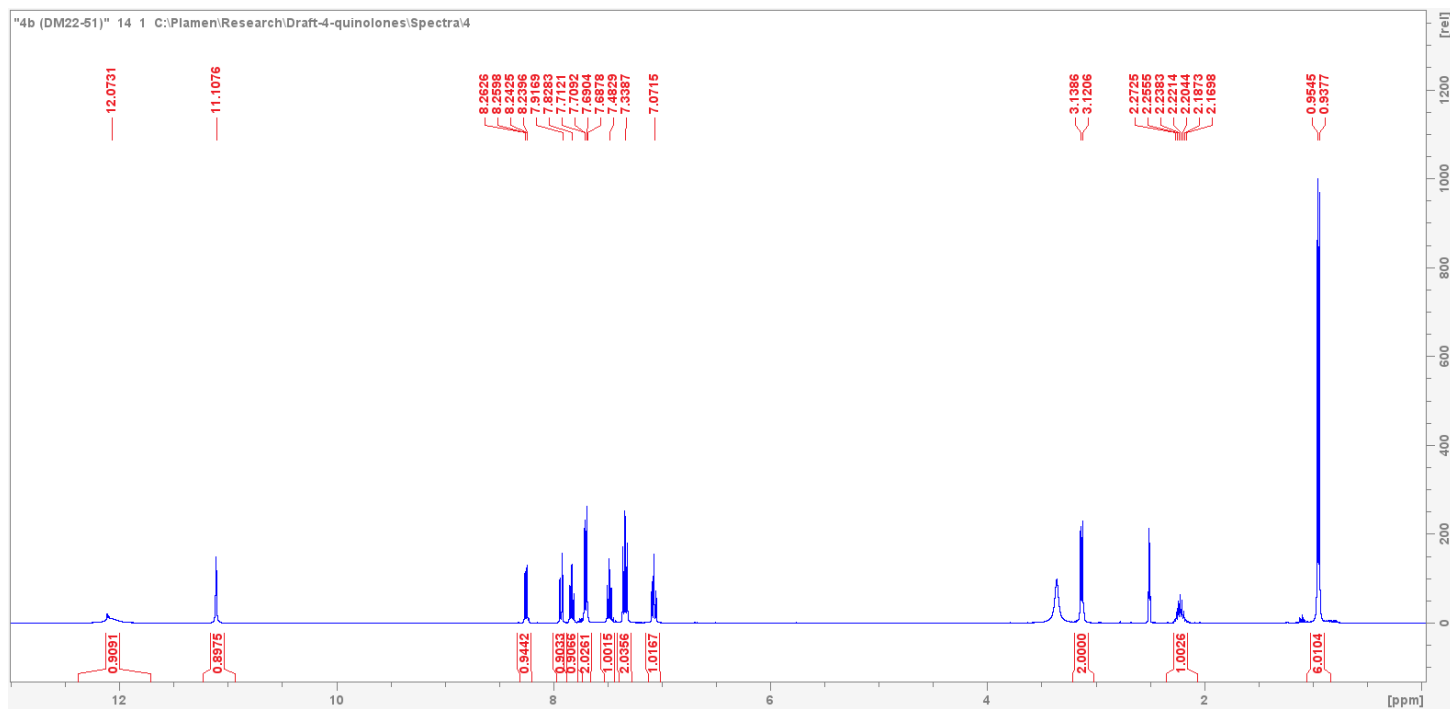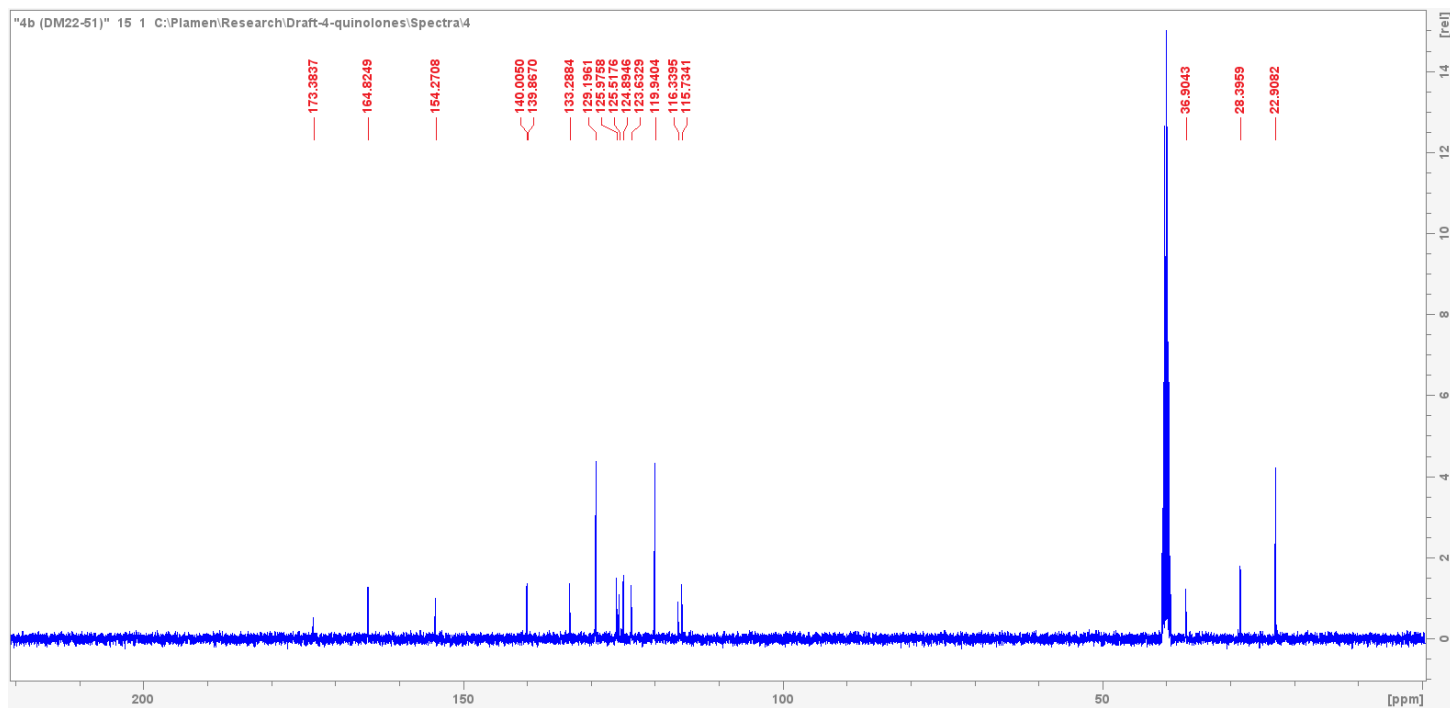

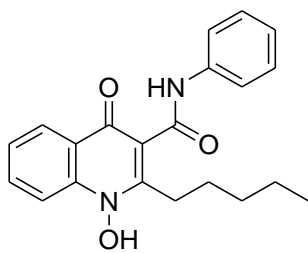

4c

400 MHz, DMSO-*d*<sub>6</sub>

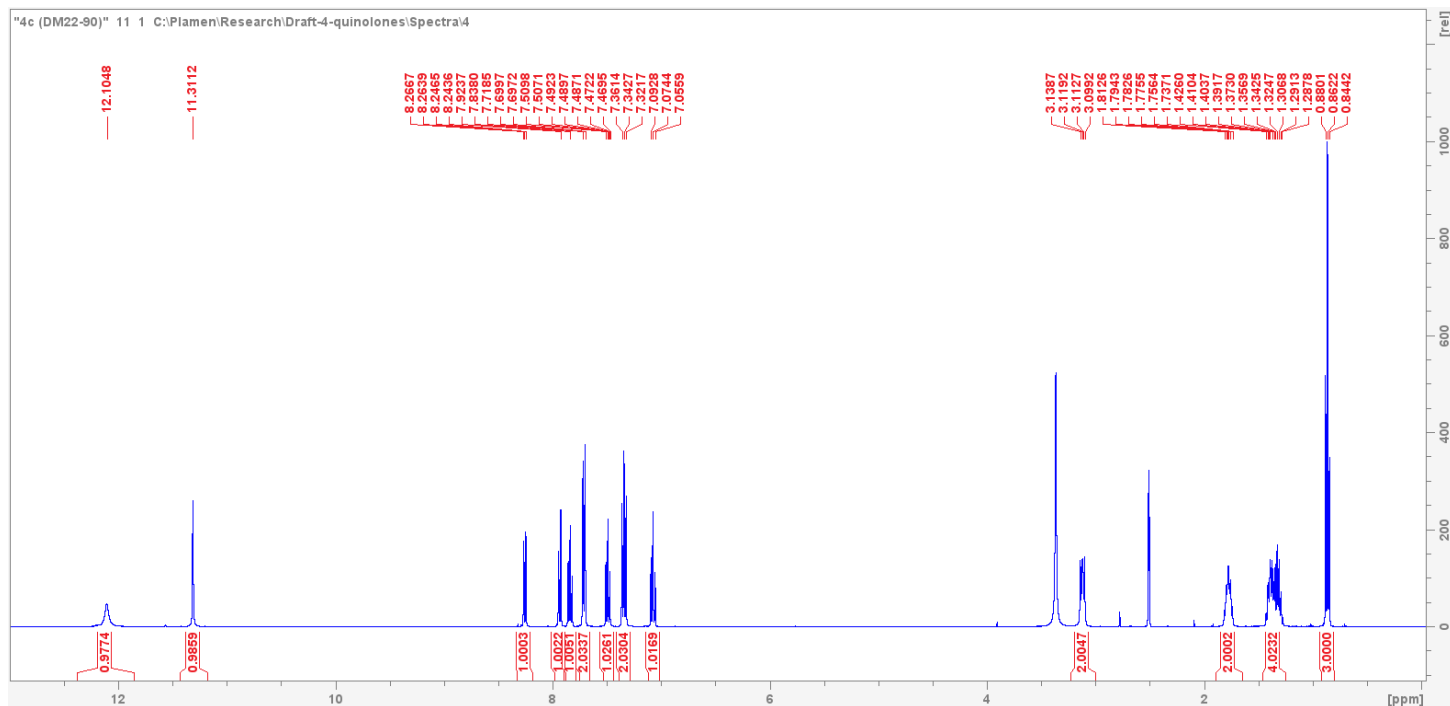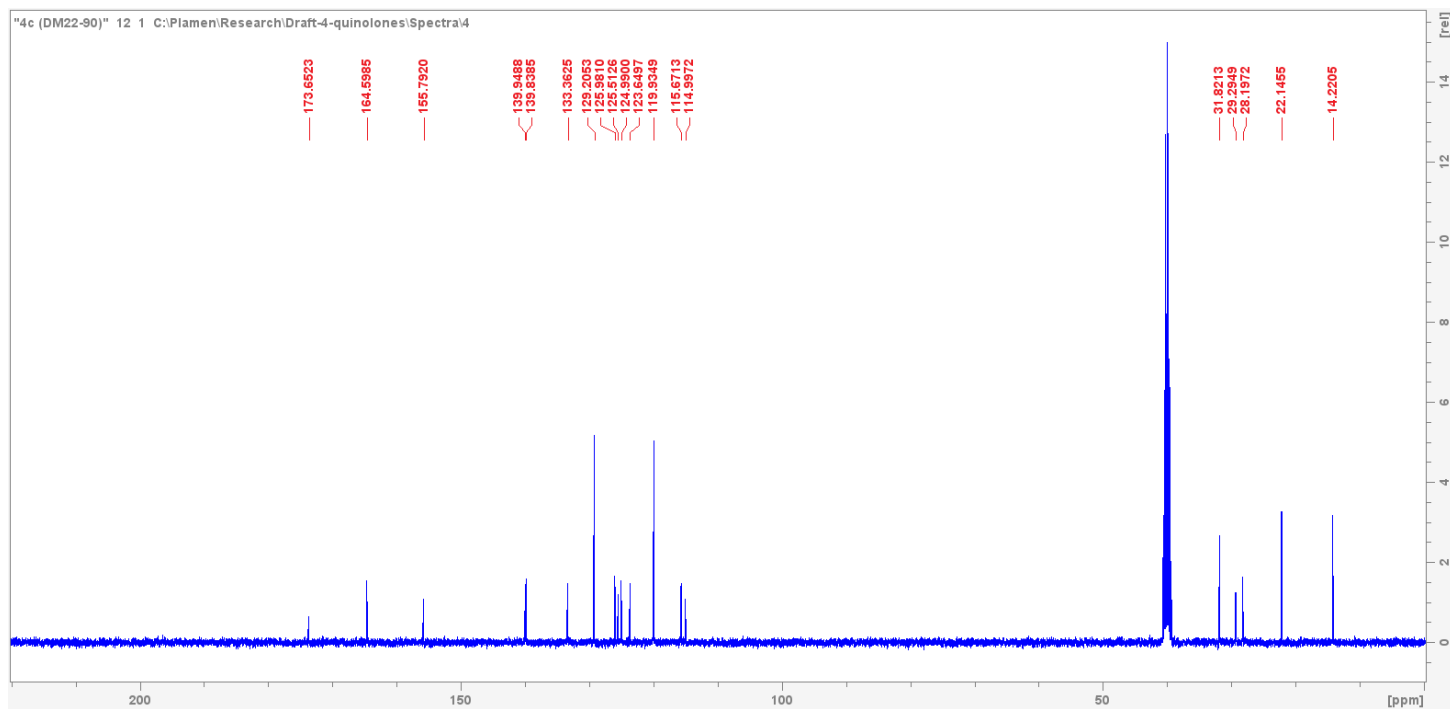

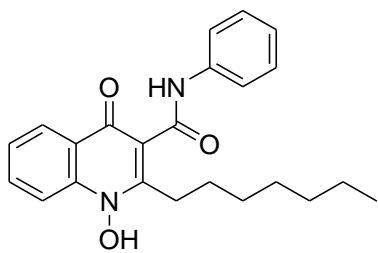

4d

400 MHz, DMSO-*d*<sub>6</sub>

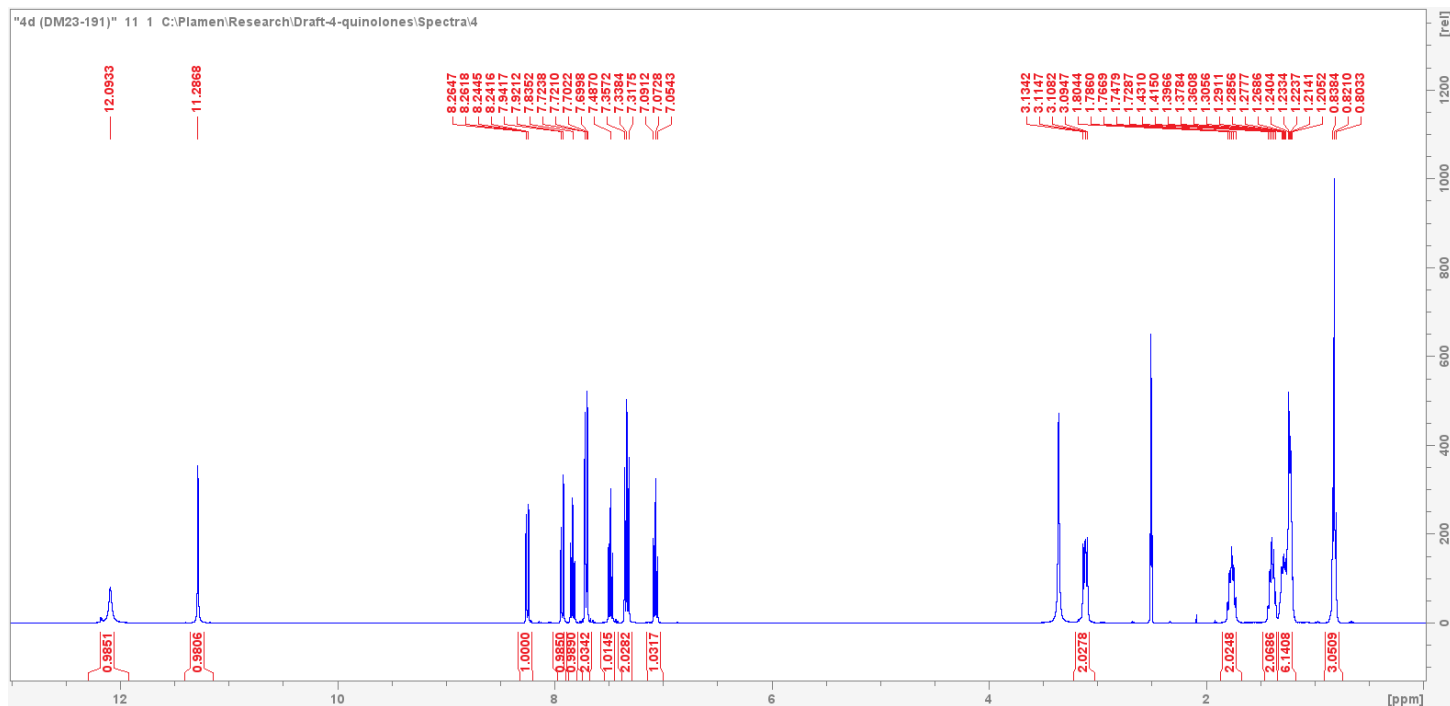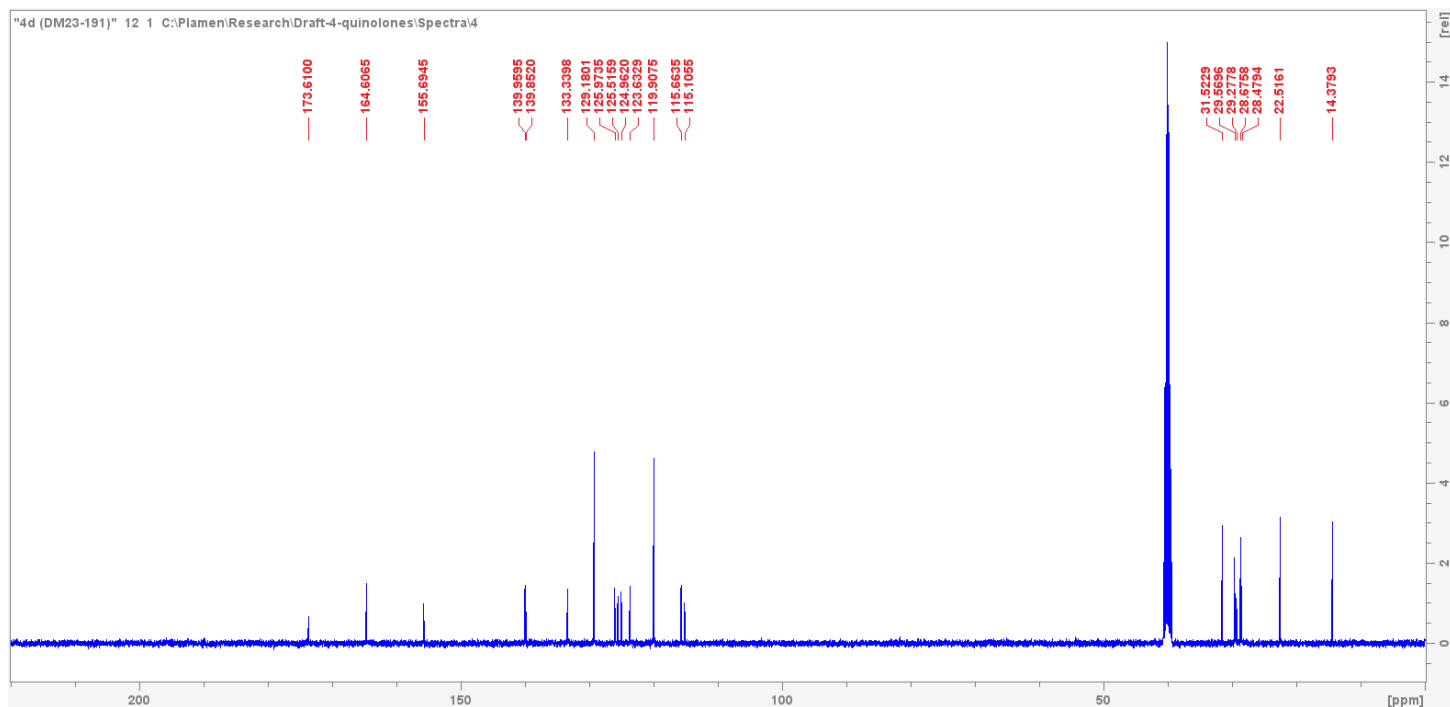

4e

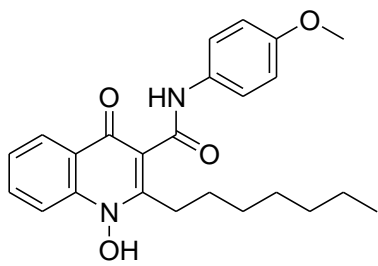

400 MHz, DMSO-*d*<sub>6</sub>

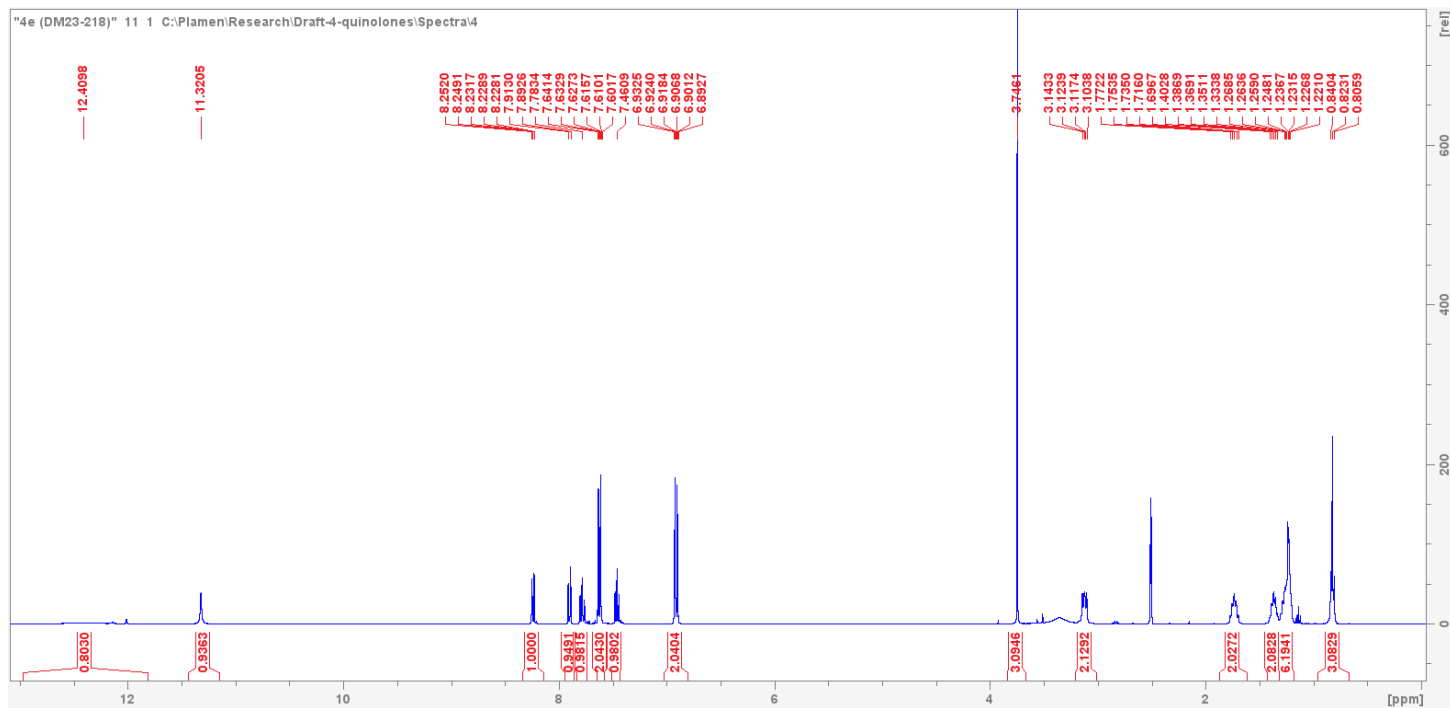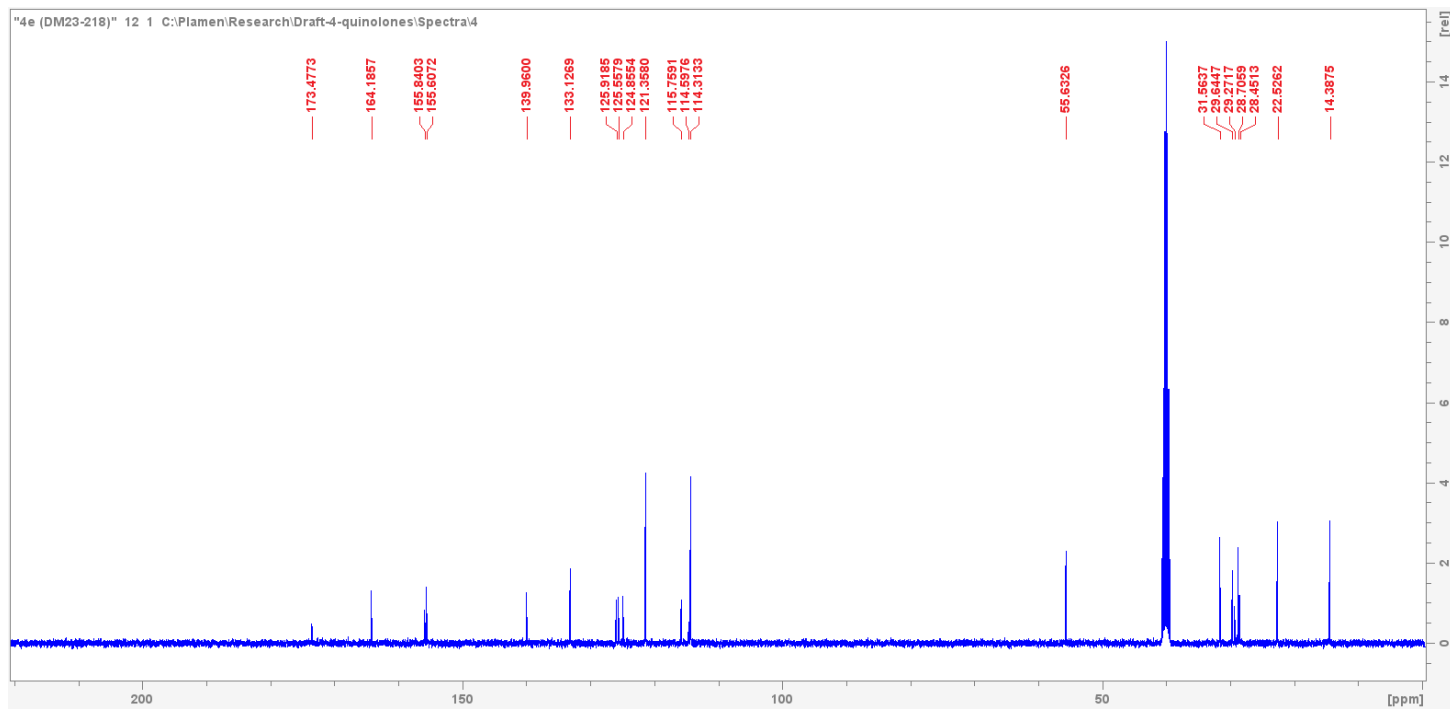

5a

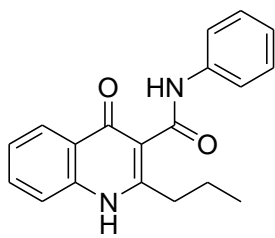

400 MHz, DMSO-*d*<sub>6</sub>

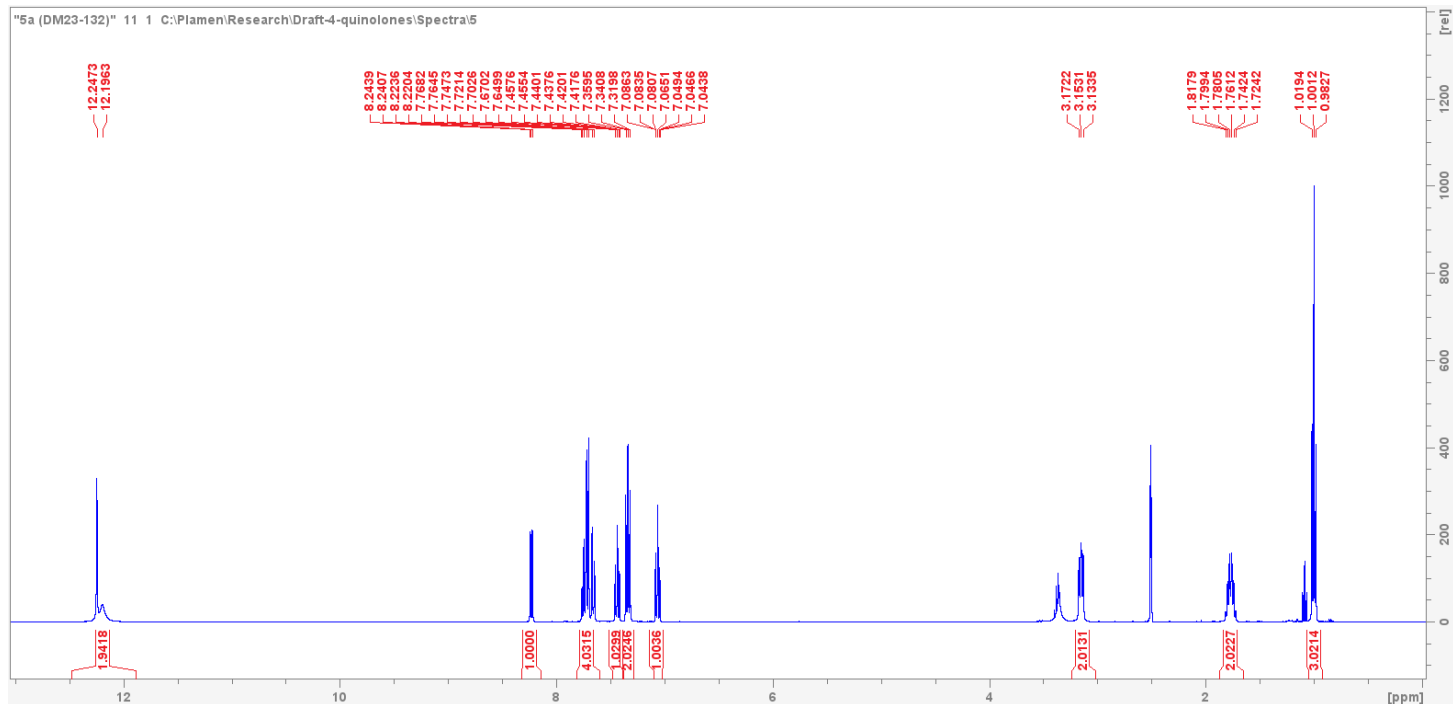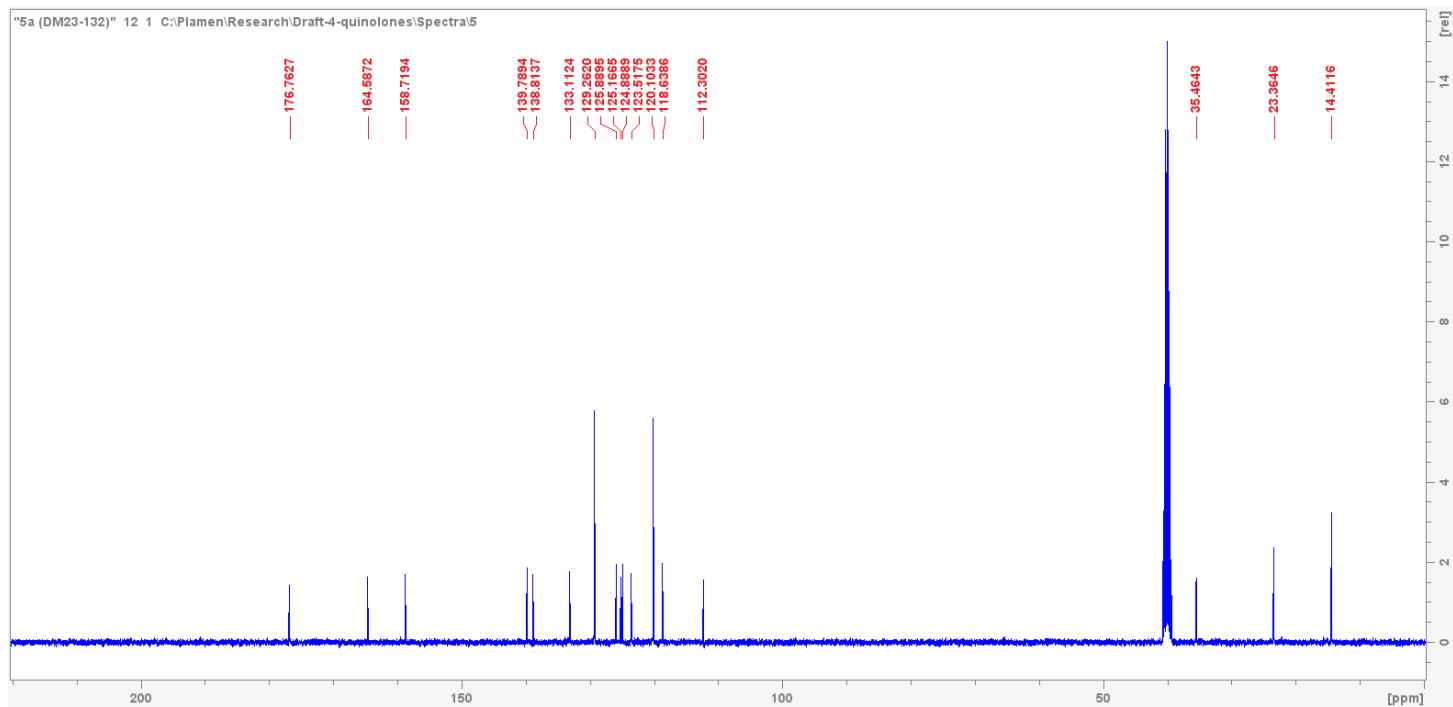



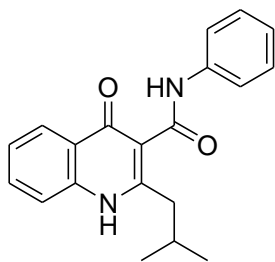

5b

400 MHz, DMSO-*d*<sub>6</sub>

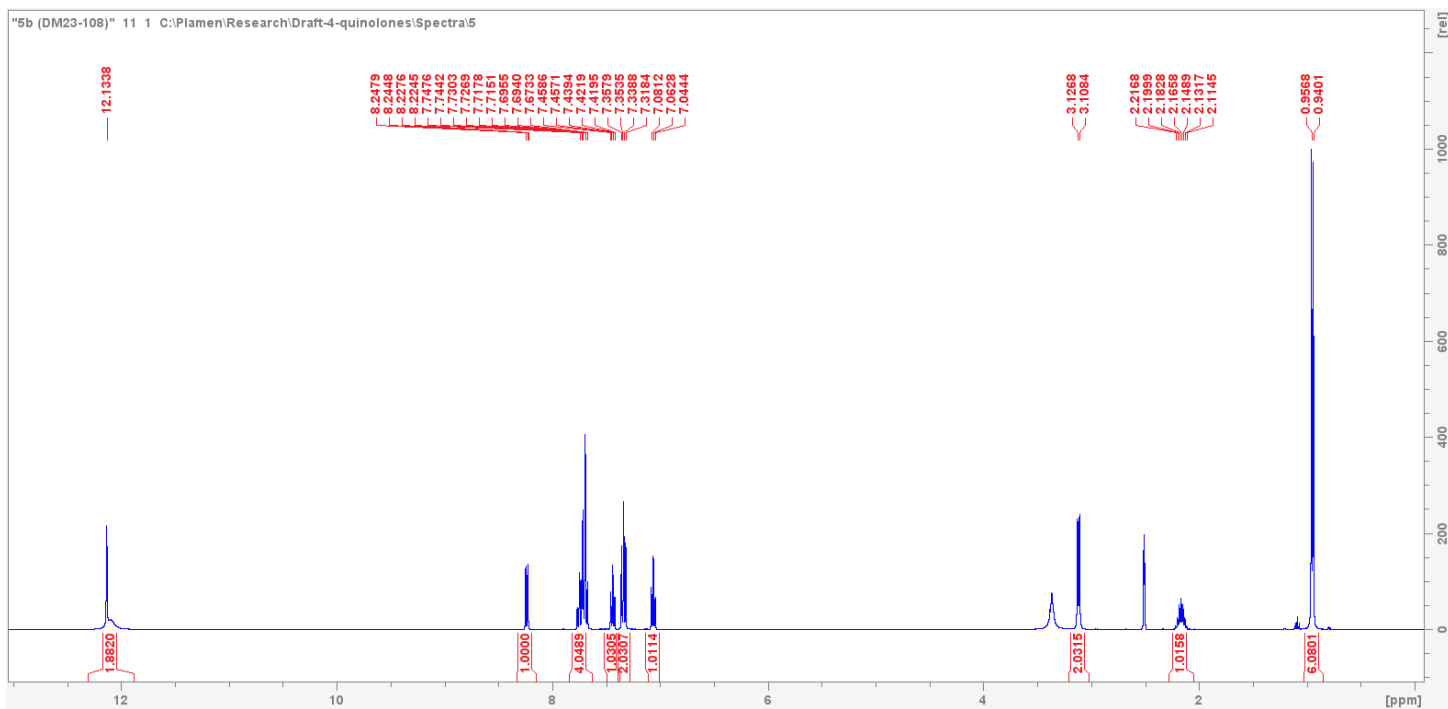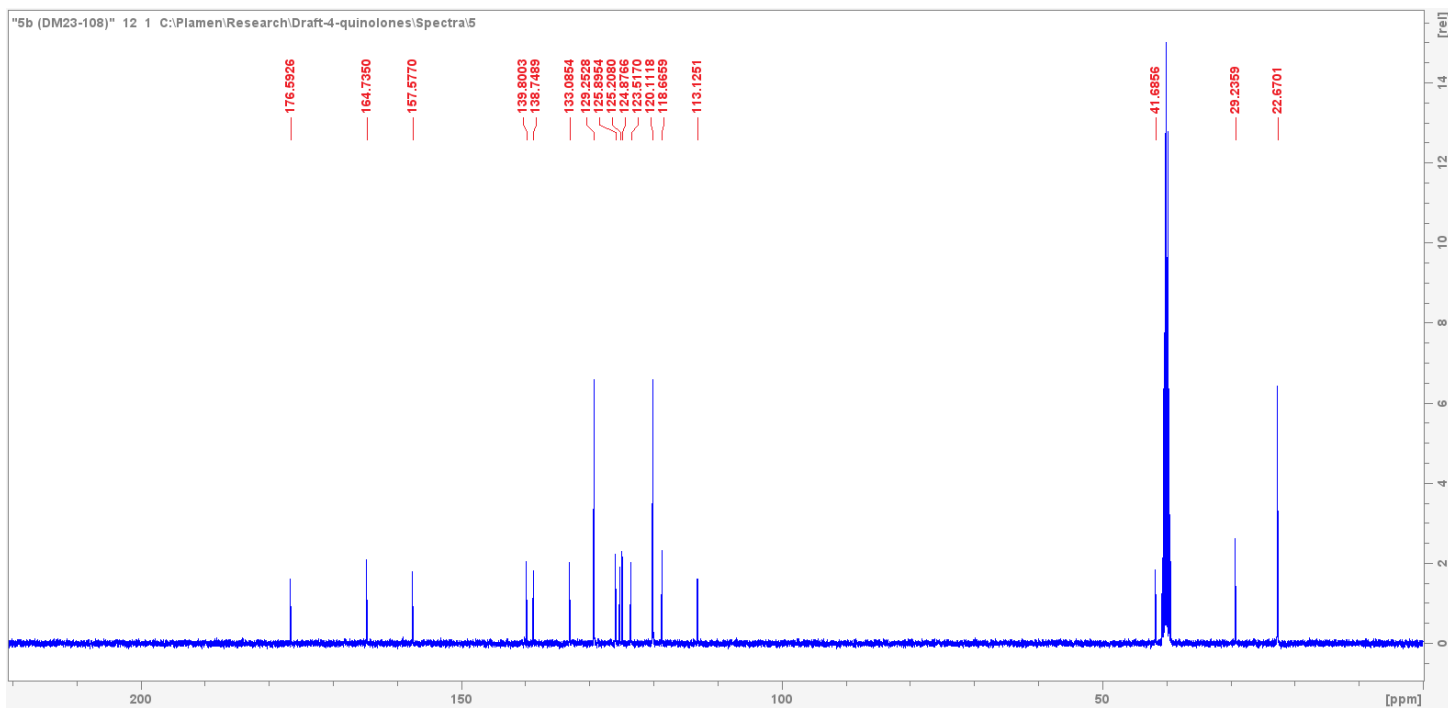

5c

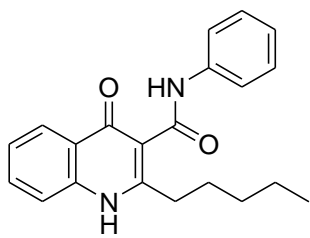

400 MHz, DMSO-d<sub>6</sub>

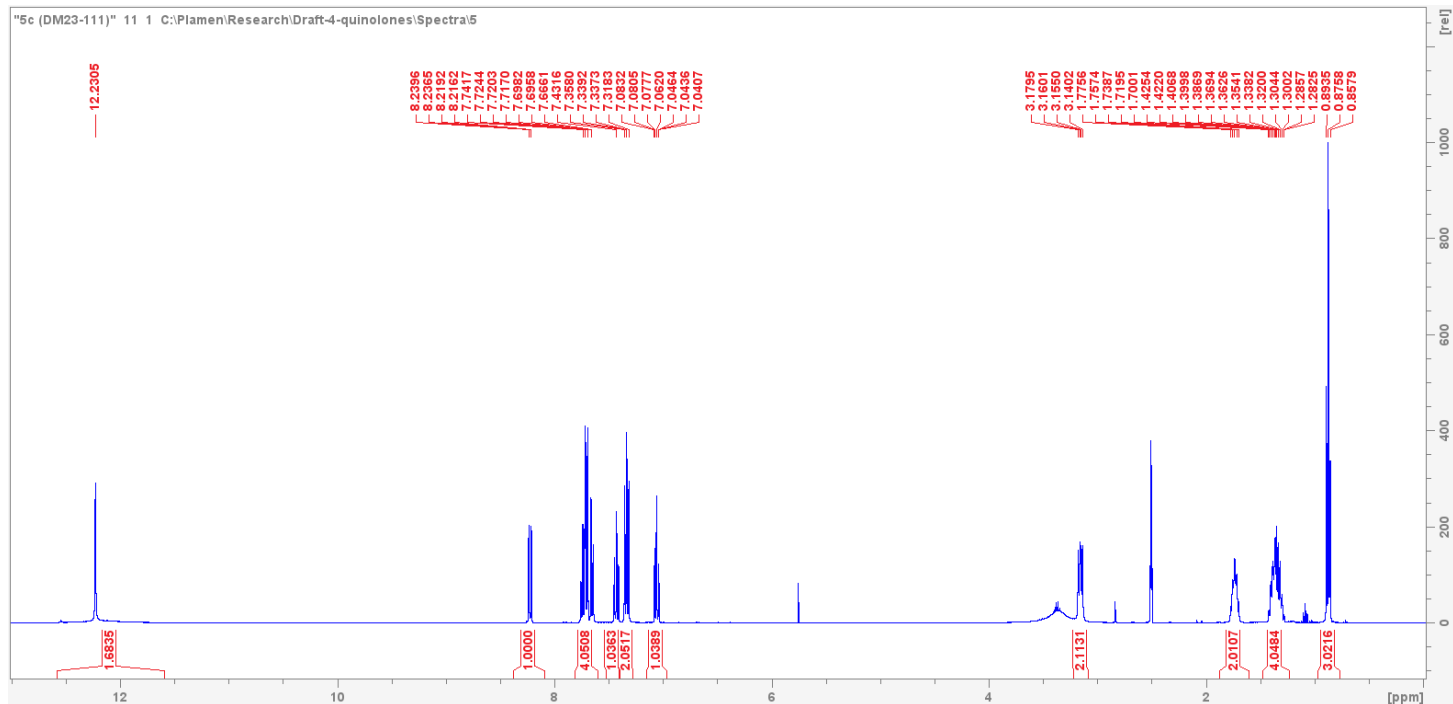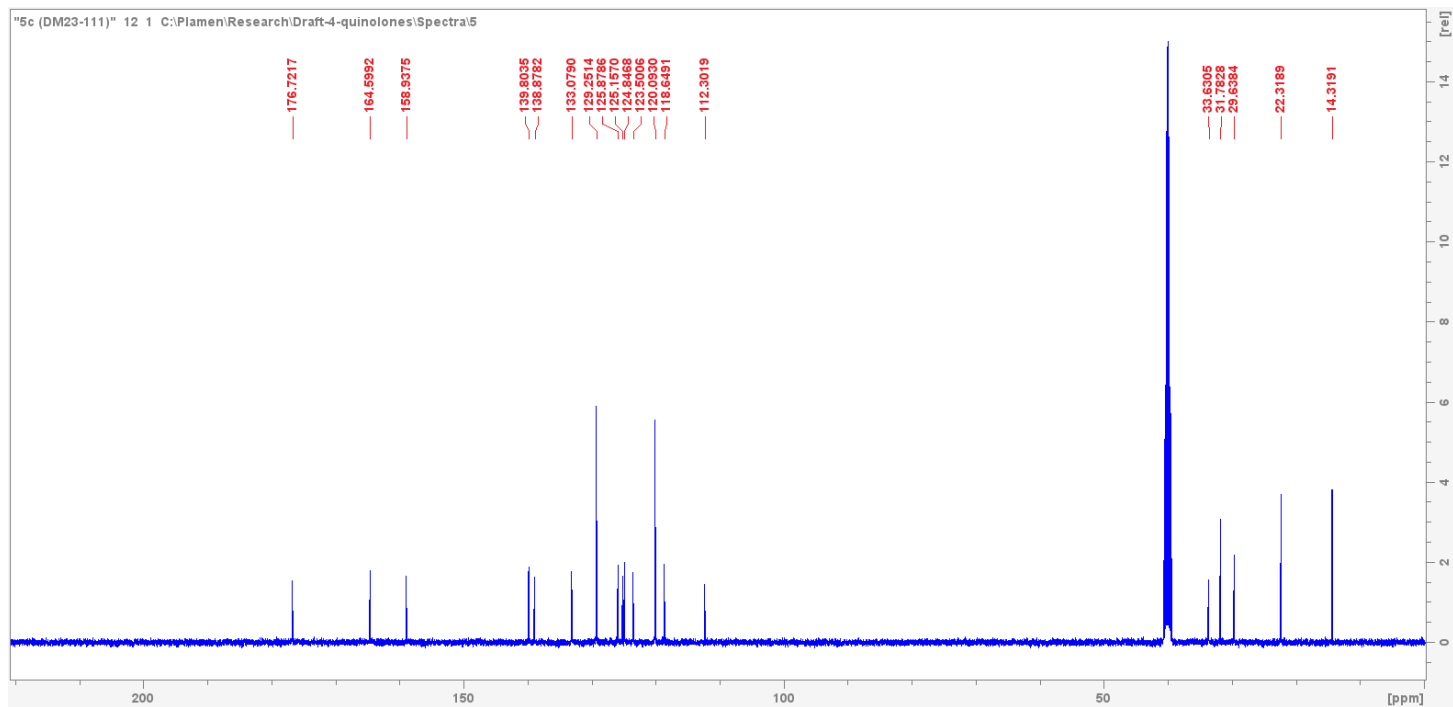

5d

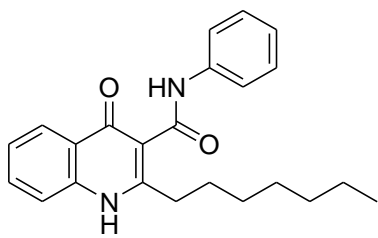

400 MHz, DMSO-*d*<sub>6</sub>

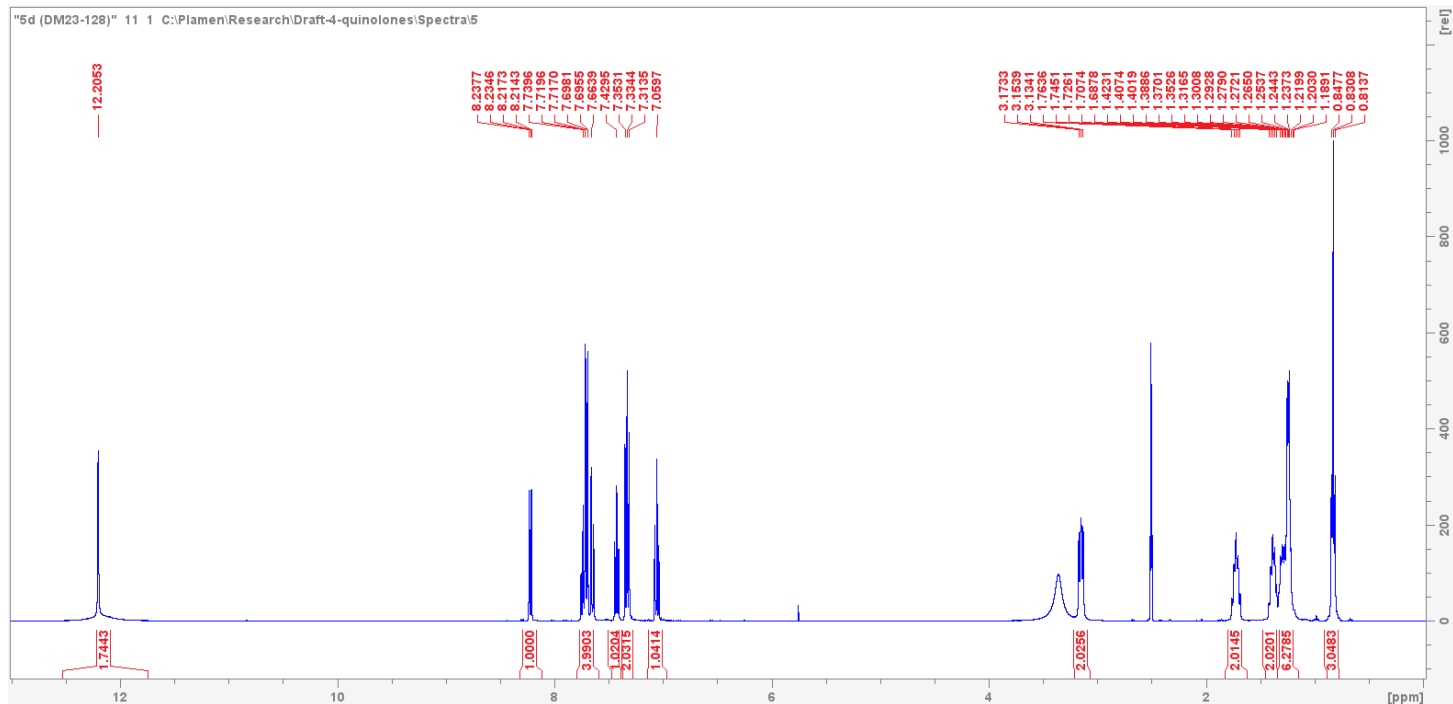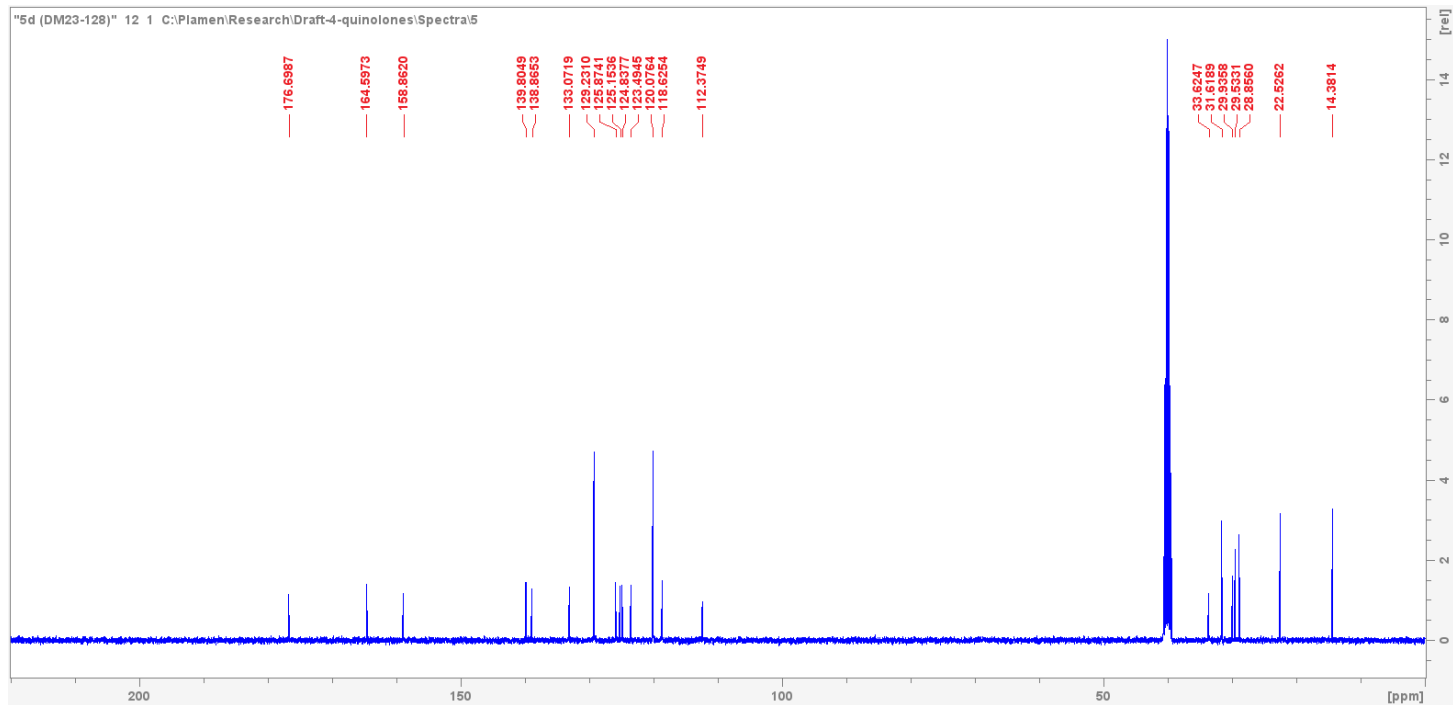

5e

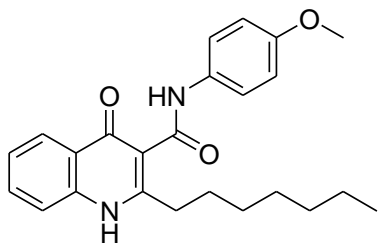

400 MHz, DMSO- $d_6$

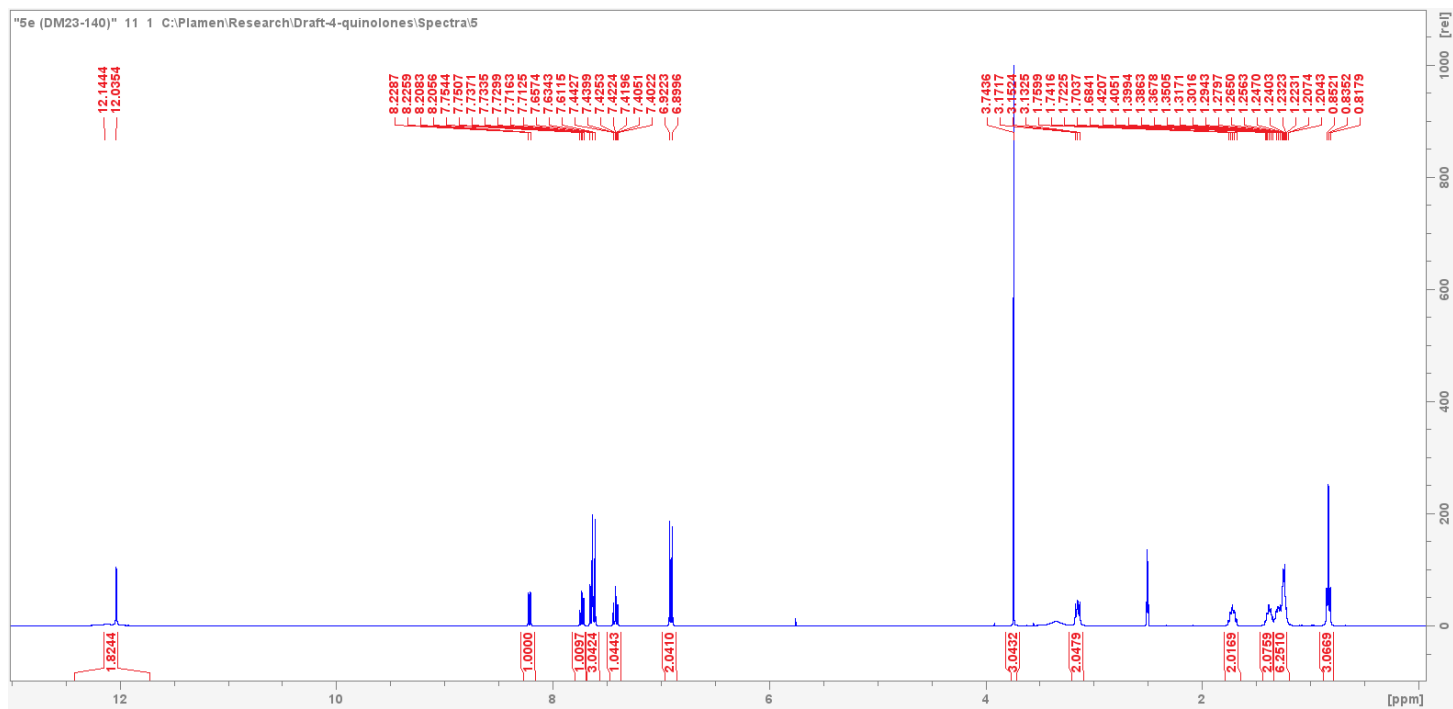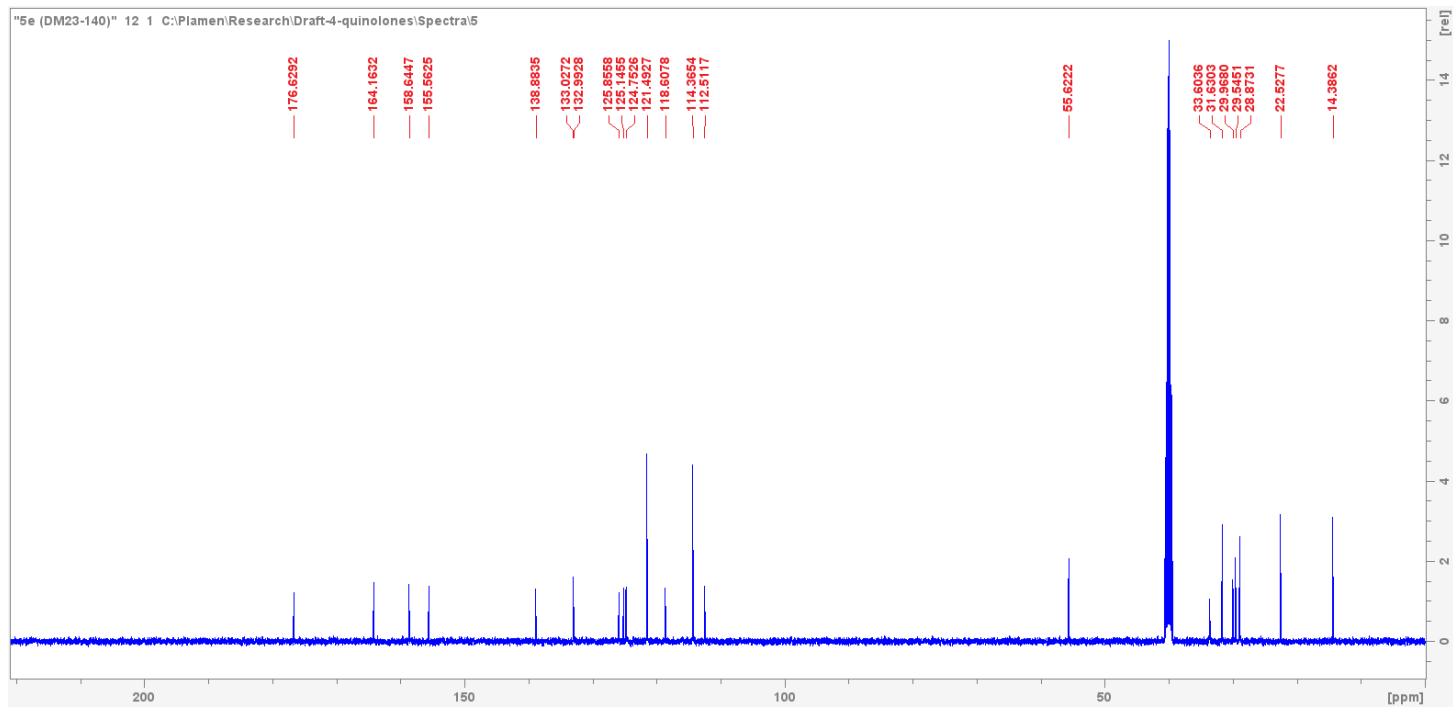

5f

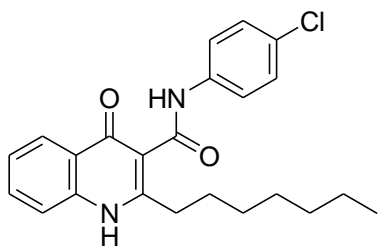

400 MHz, DMSO-*d*<sub>6</sub>

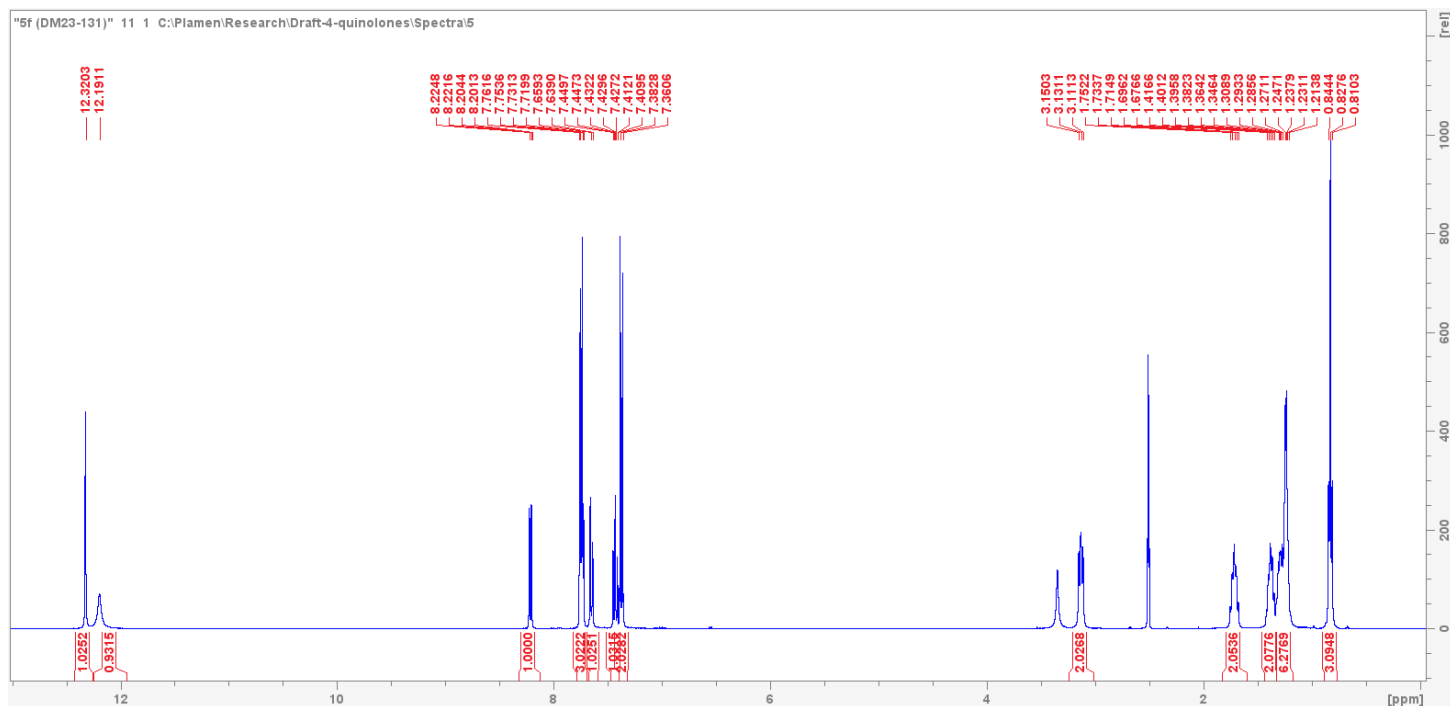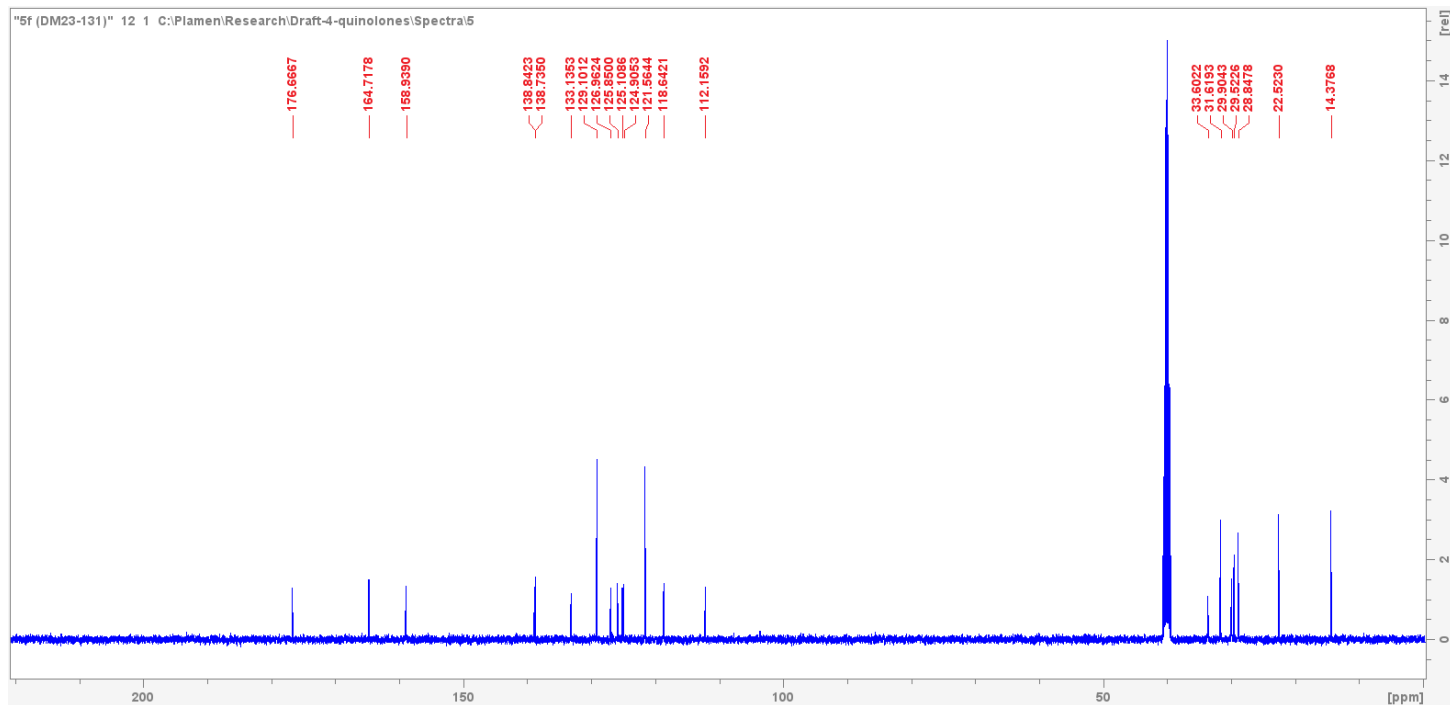

5g

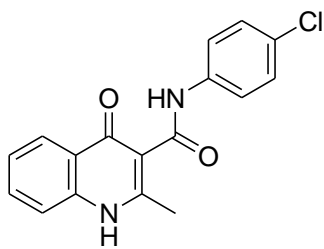

400 MHz, DMSO-*d*<sub>6</sub>

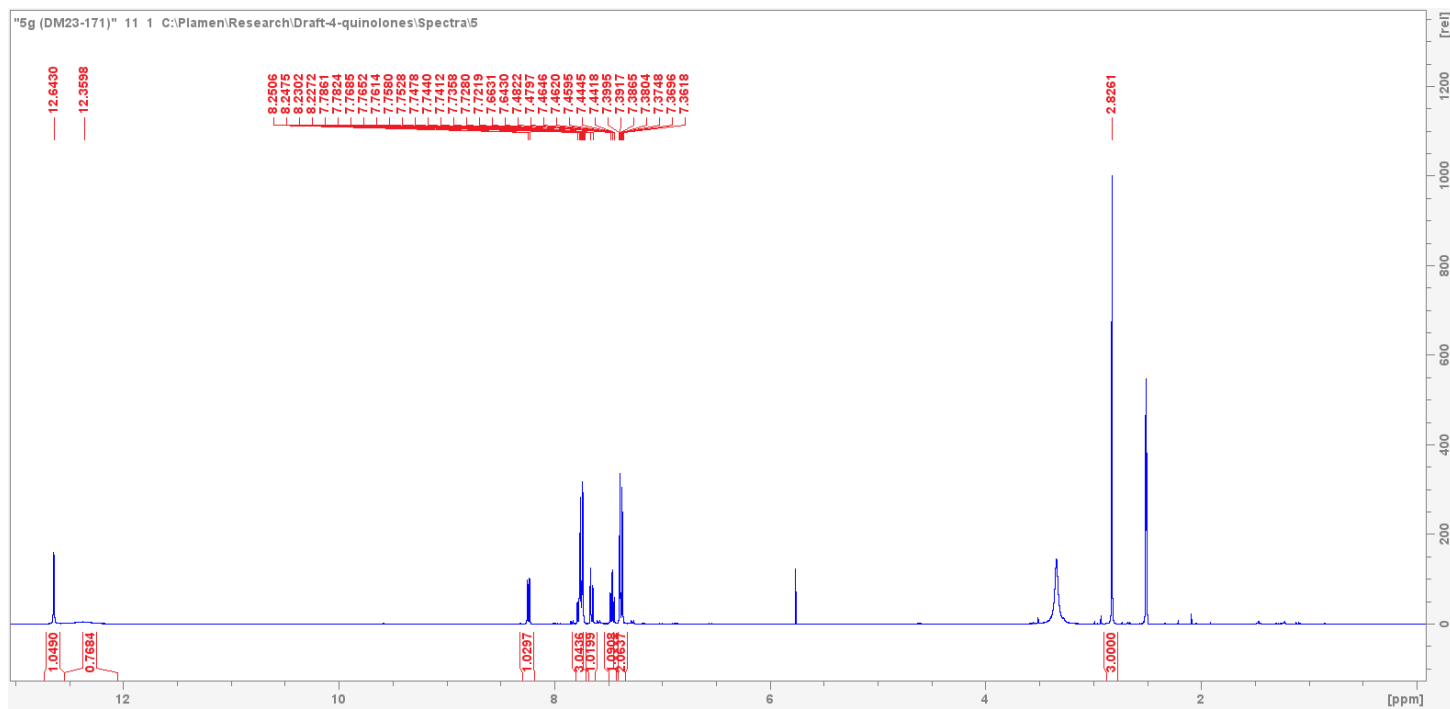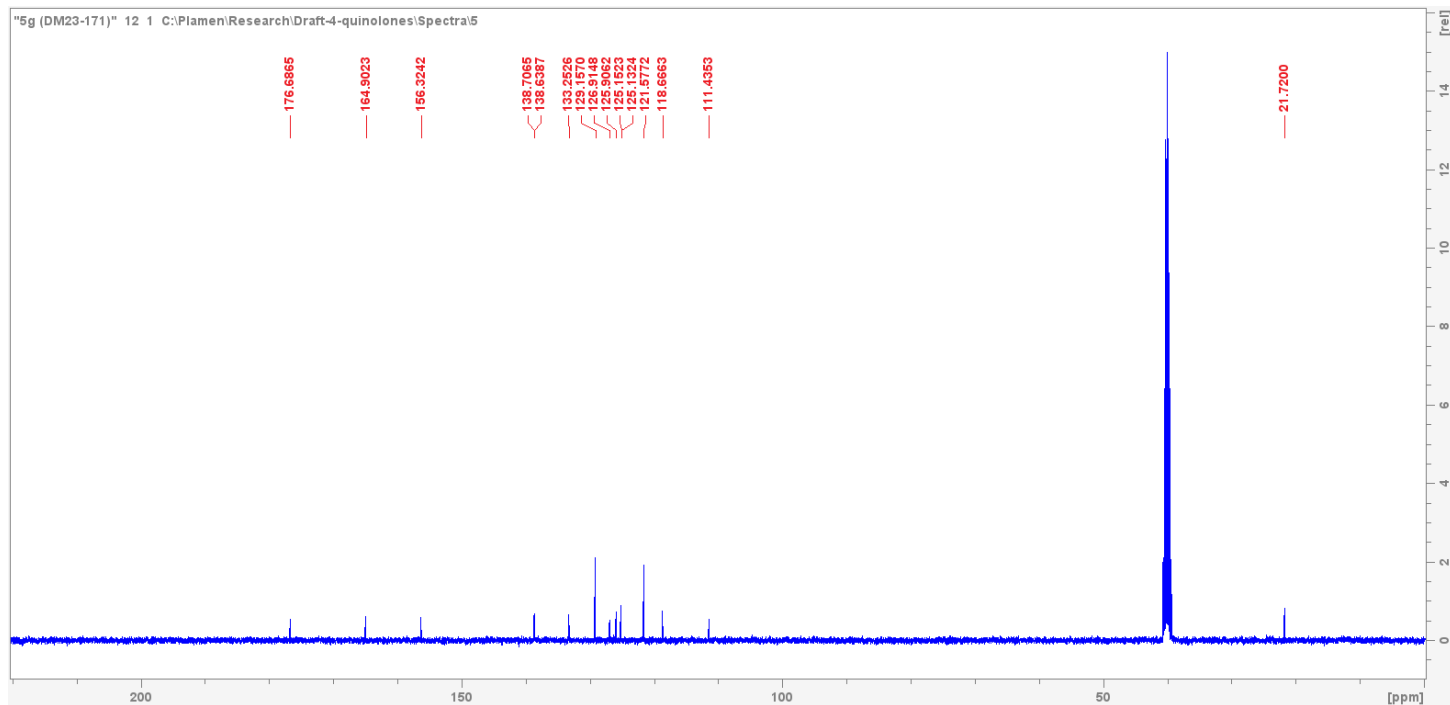

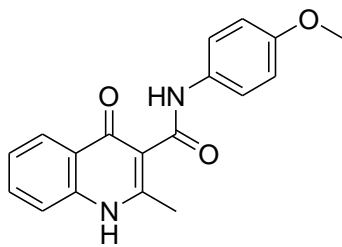

5h

400 MHz, DMSO-*d*<sub>6</sub>

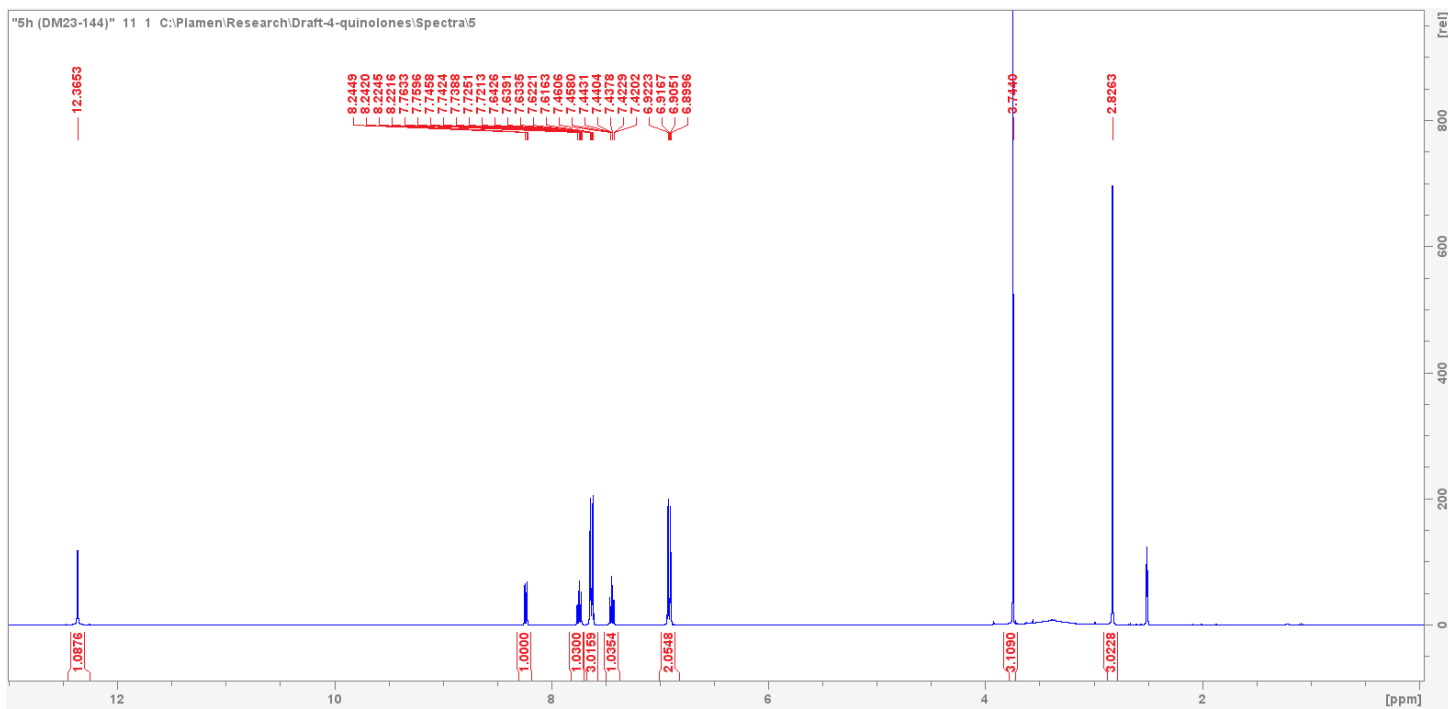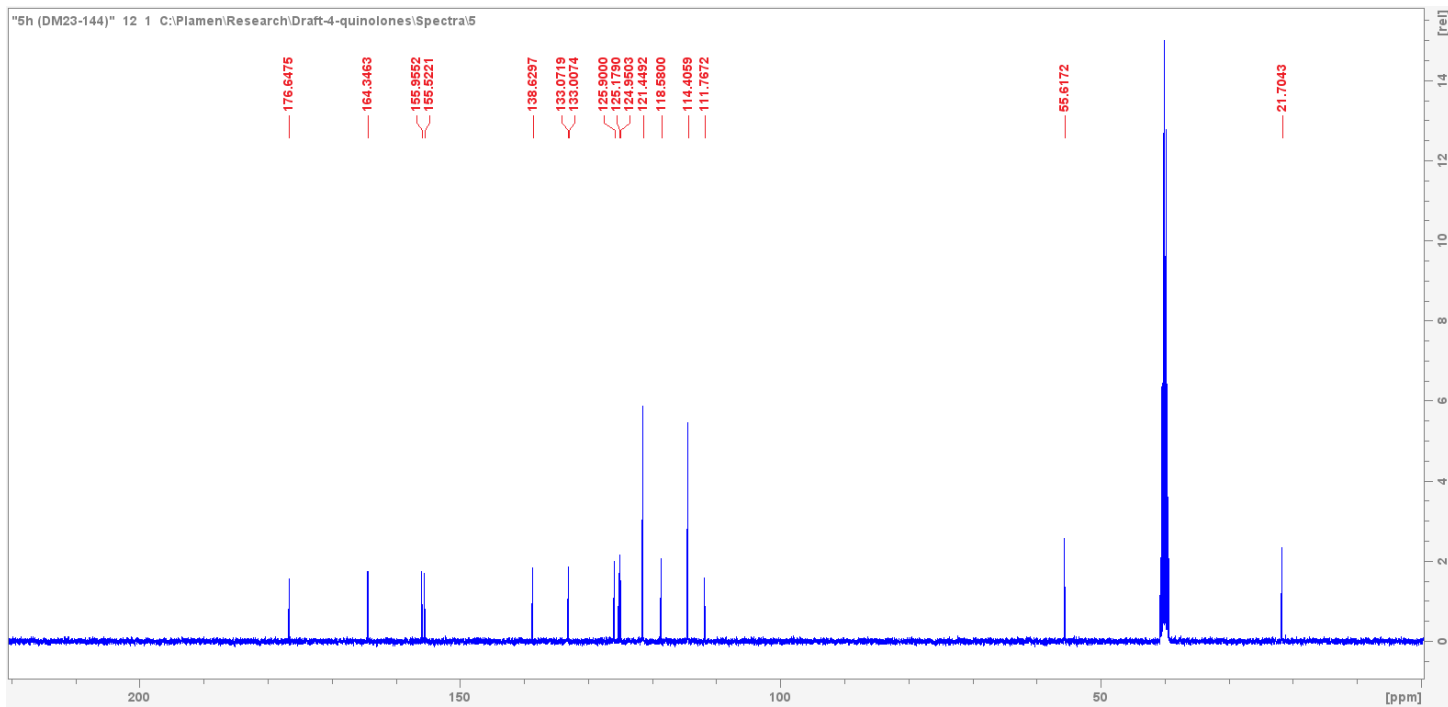

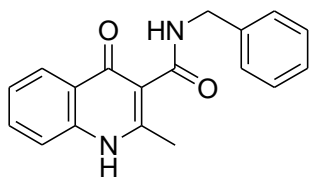

5i

400 MHz, DMSO-*d*<sub>6</sub>

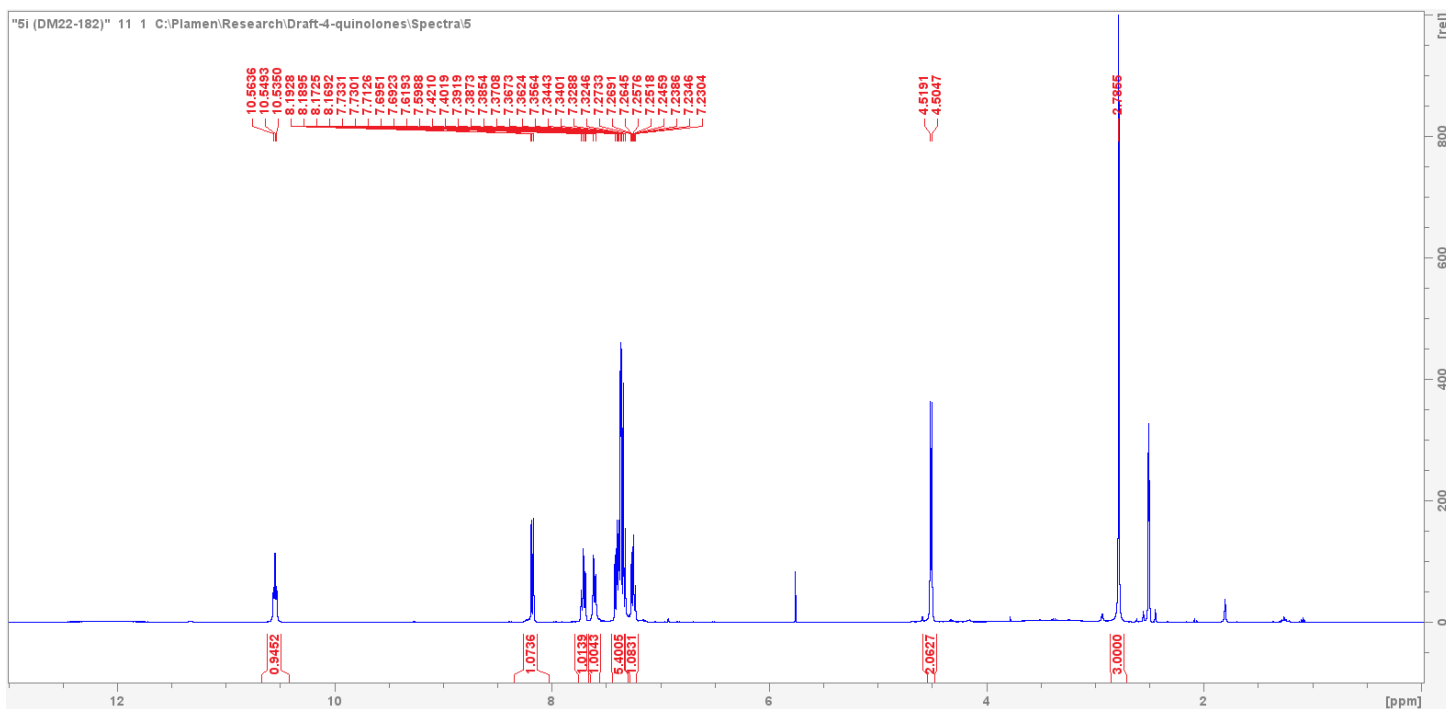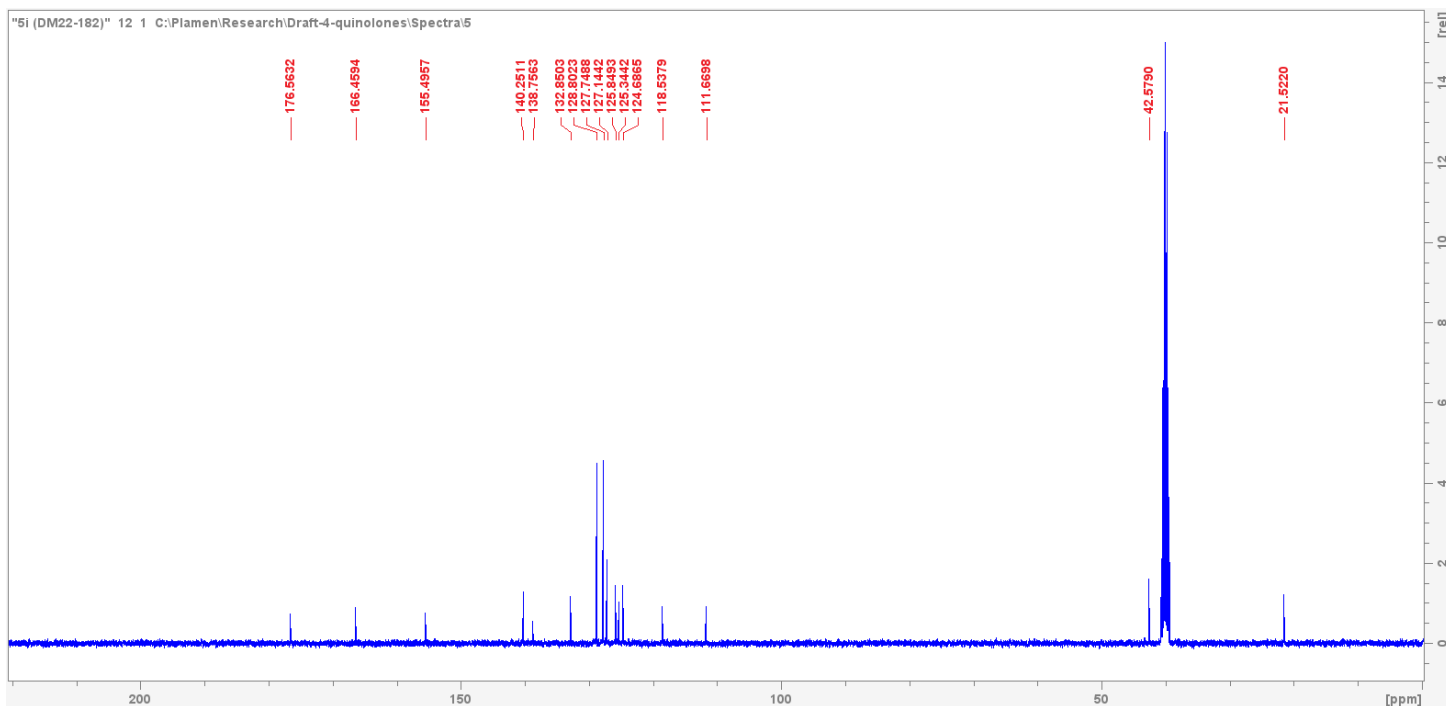



8a

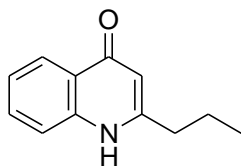

400 MHz, DMSO-d<sub>6</sub>

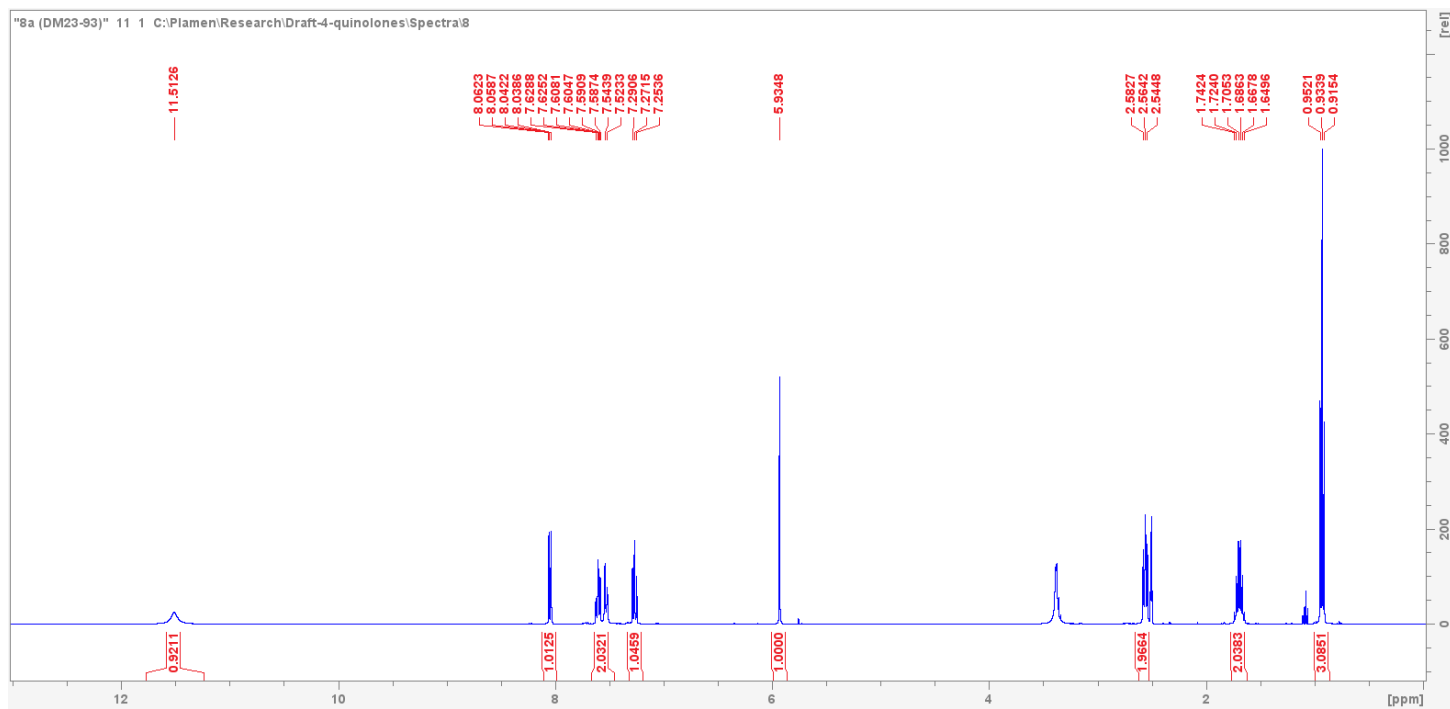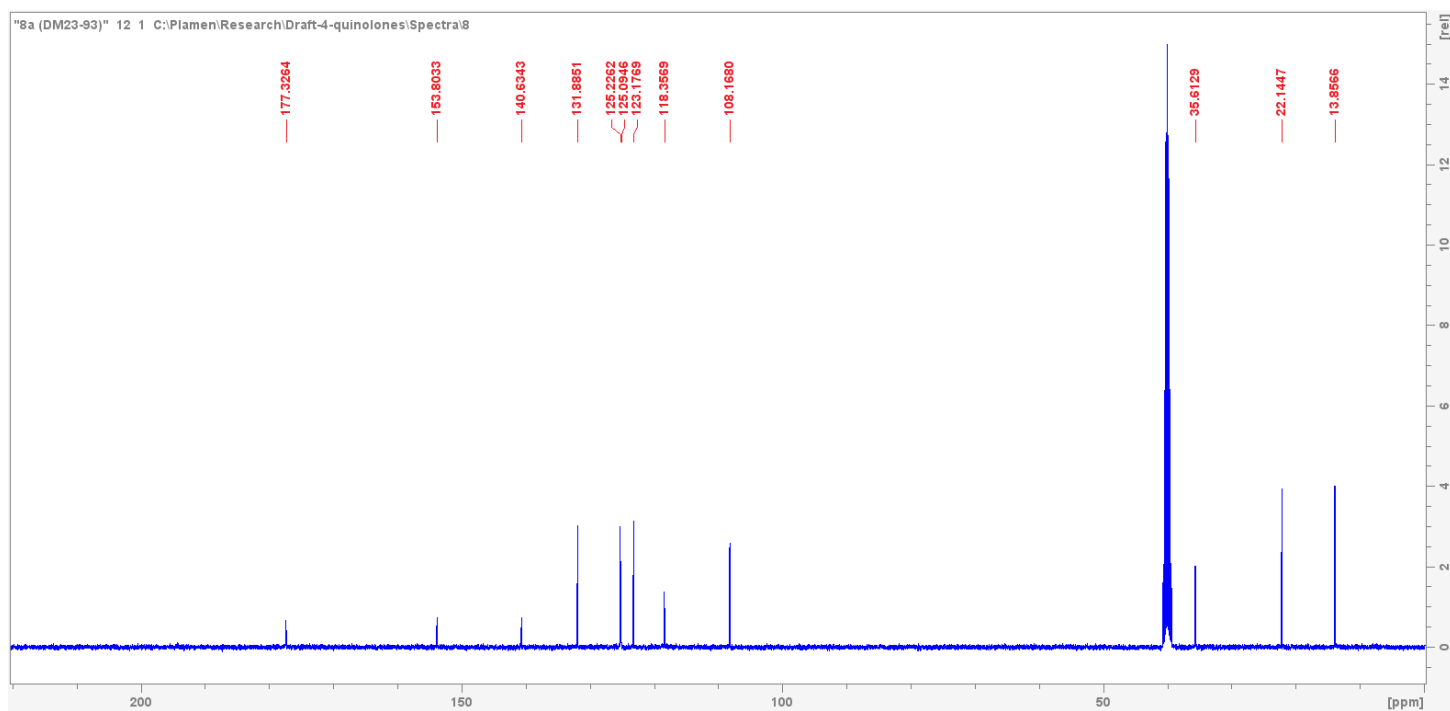

8b

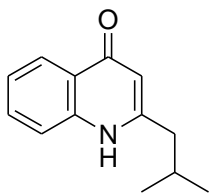

400 MHz, DMSO-*d*<sub>6</sub>

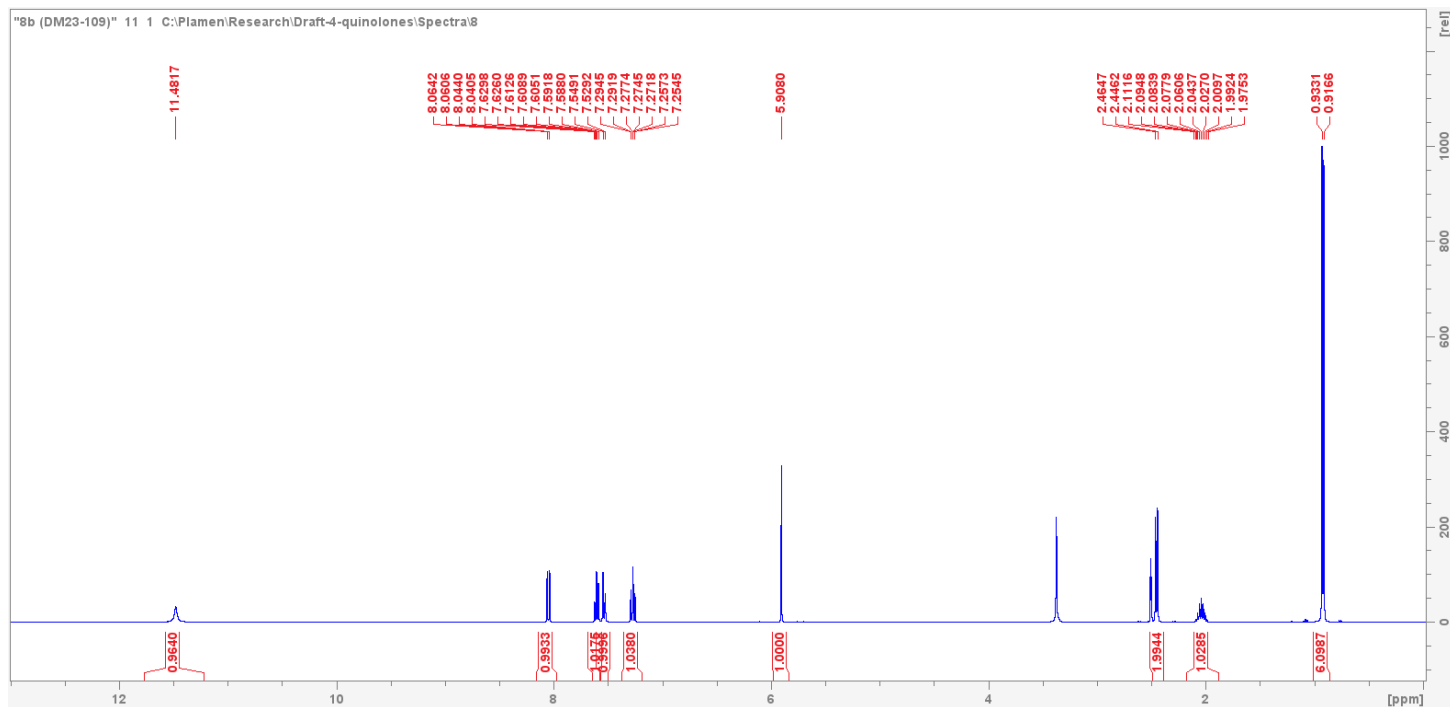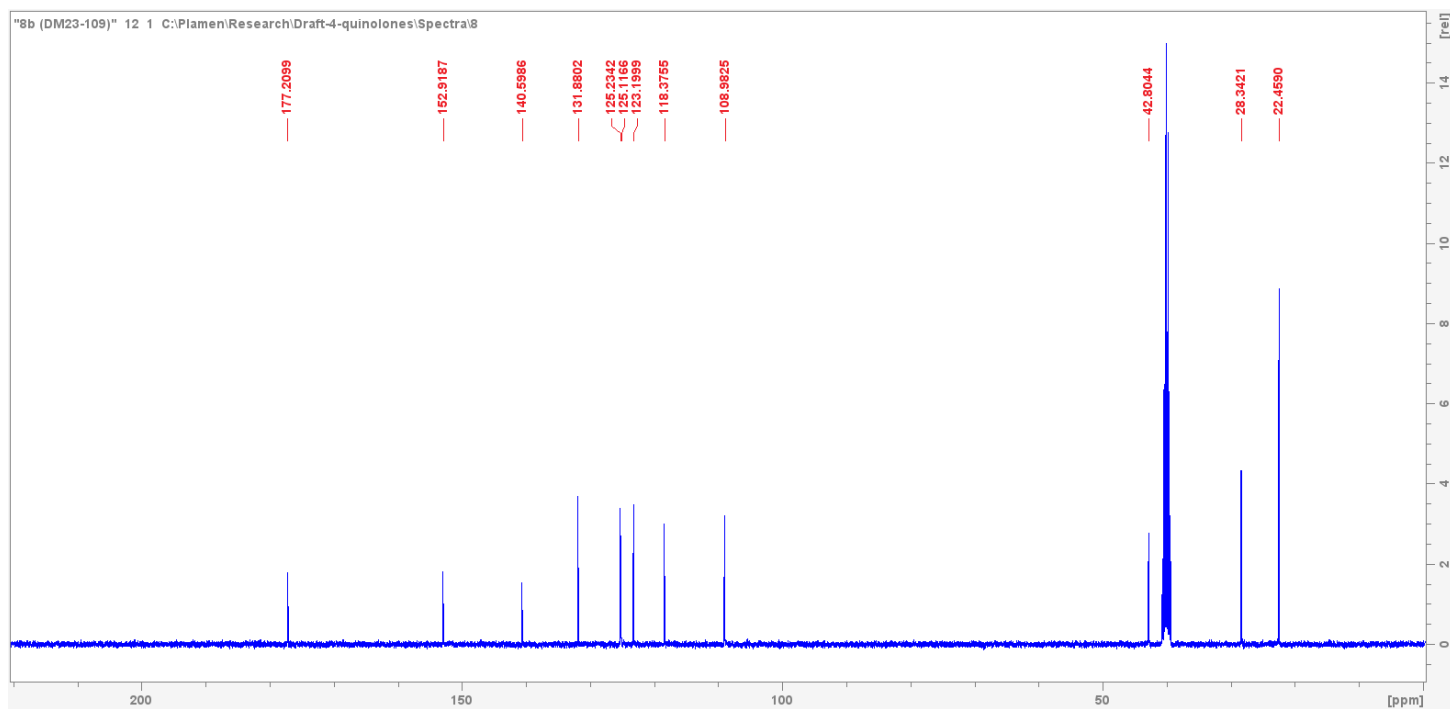

8c

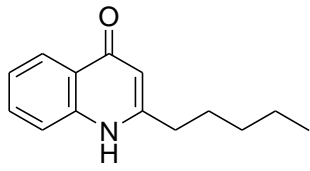

400 MHz, DMSO-*d*<sub>6</sub>

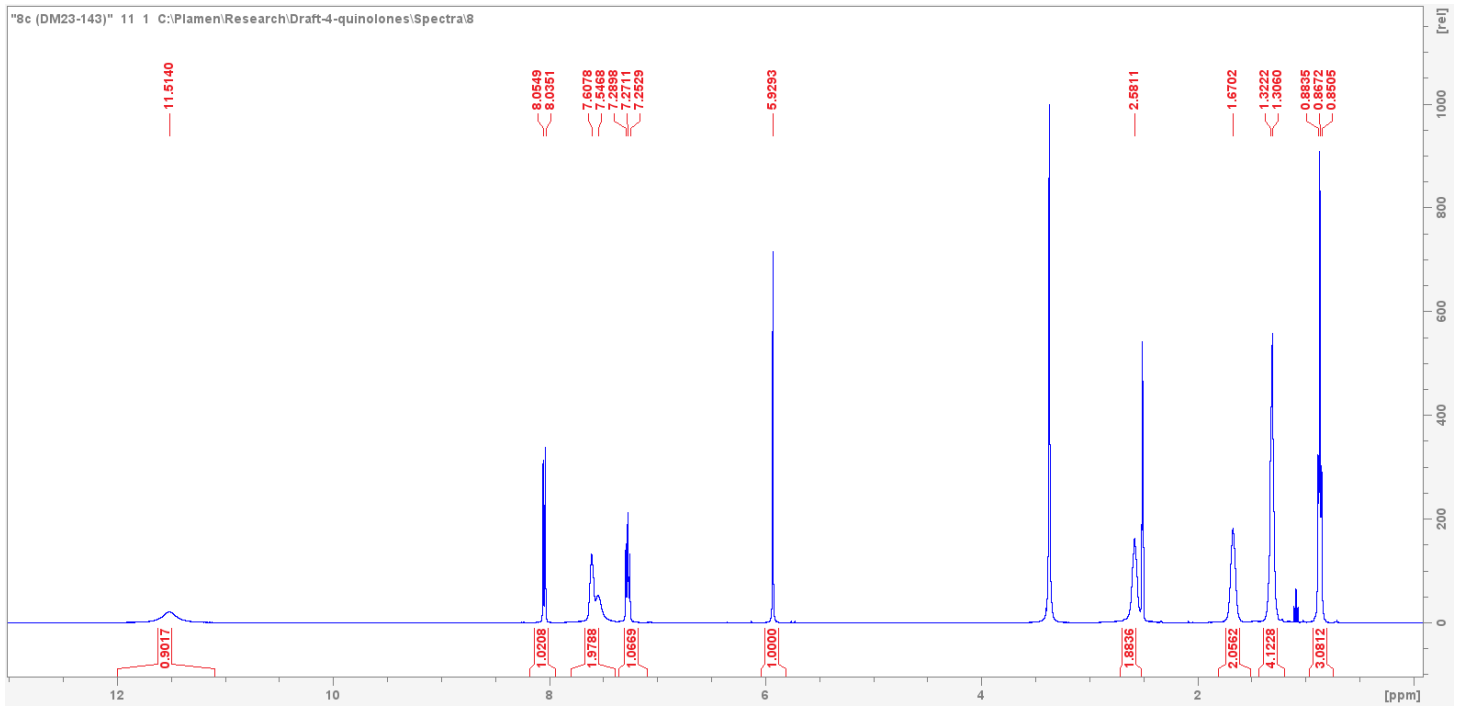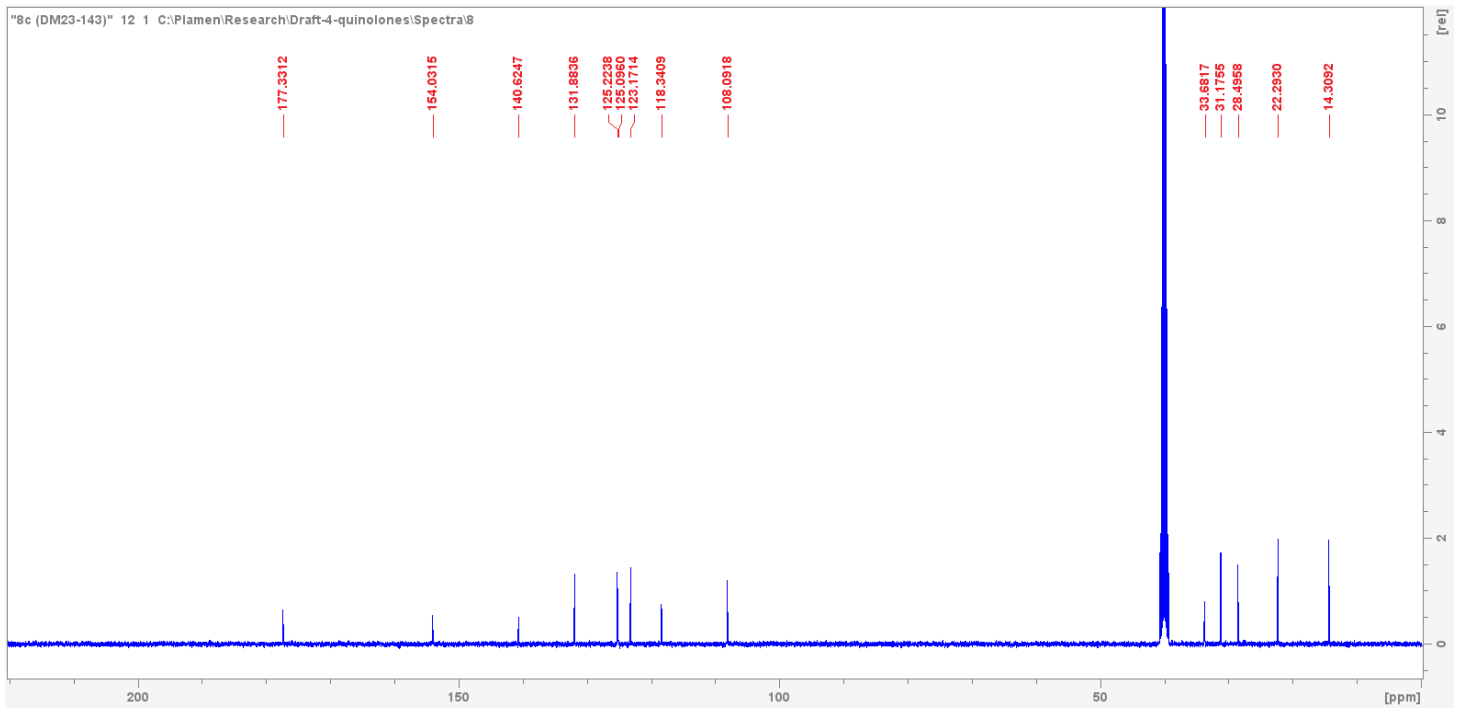

8d

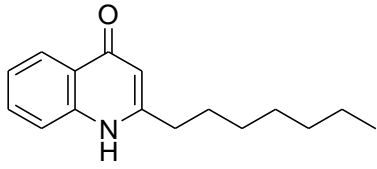

400 MHz, DMSO-*d*<sub>6</sub>

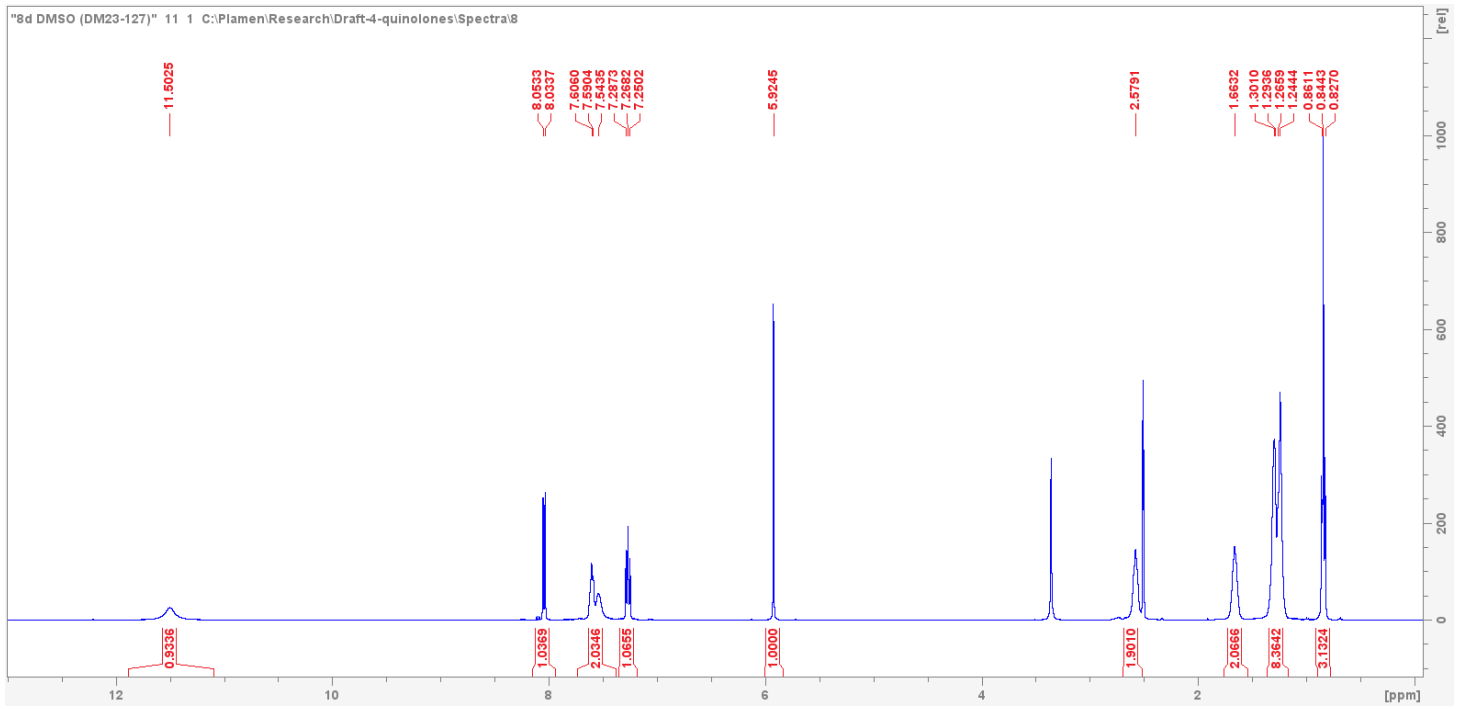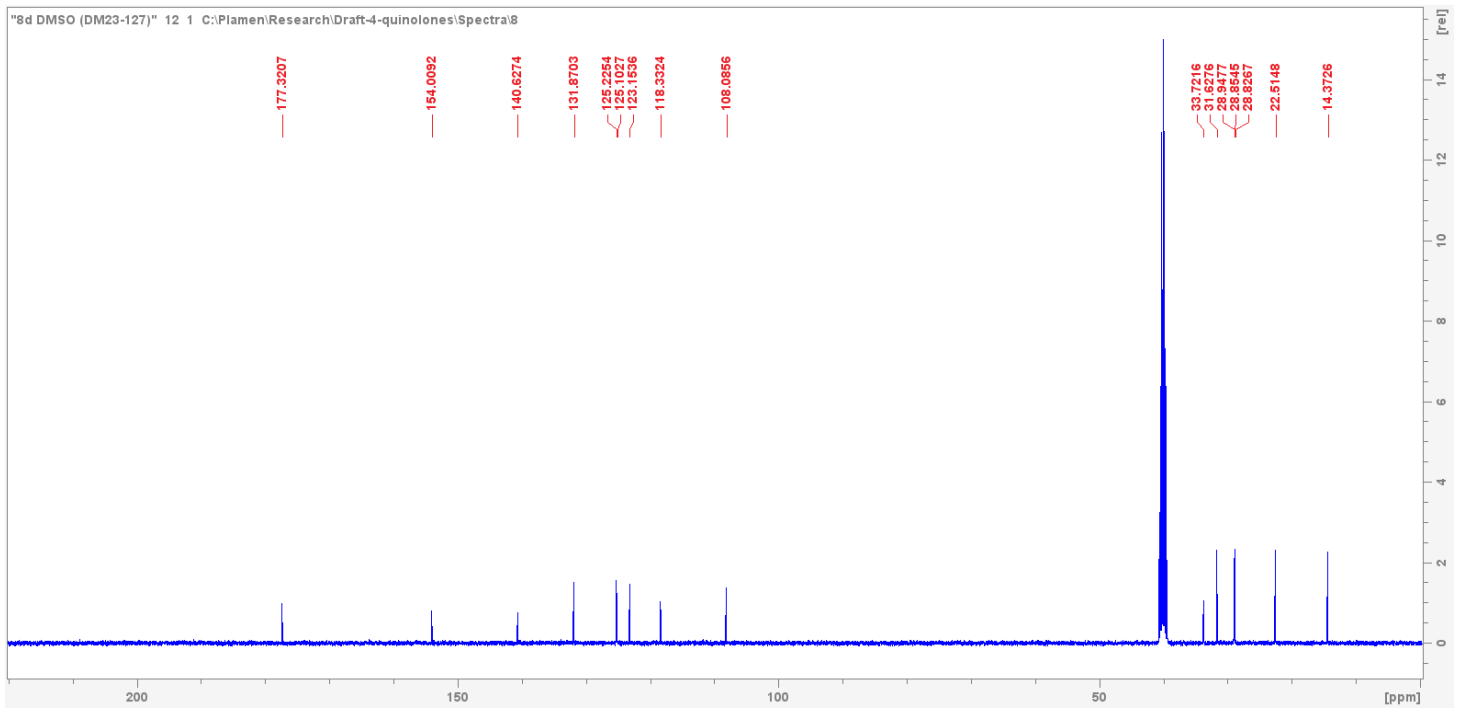

Supplement: Additional file 2 [file 1860-5397-19-132-S2.pdf]
